# 1      **Therapeutic suppression of proteolipid protein rescues Pelizaeus-** 2      **Merzbacher Disease in mice**

3  
4      Matthew S. Elitt<sup>1</sup>, Lilianne Barbar<sup>1</sup>, H. Elizabeth Shick<sup>1</sup>, Berit E. Powers<sup>2</sup>, Yuka Maeno-  
5      Hikichi<sup>1</sup>, Mayur Madhavan<sup>1</sup>, Kevin C. Allan<sup>1</sup>, Baraa S. Nawash<sup>1</sup>, Zachary S. Nevin<sup>1</sup>, Hannah E.  
6      Olsen<sup>1</sup>, Midori Hitomi<sup>3</sup>, David F. LePage<sup>1</sup>, Weihong Jiang<sup>1</sup>, Ronald A. Conlon<sup>1</sup>, Frank Rigo<sup>2</sup>,  
7      Paul J. Tesar<sup>1\*</sup>

8  
9      <sup>1</sup>Department of Genetics and Genome Sciences, Case Western Reserve University School of  
10      Medicine, Cleveland, Ohio 44106, USA.

11      <sup>2</sup>Ionis Pharmaceuticals, Carlsbad, California 92008, USA.

12      <sup>3</sup>Lerner Research Institute, Cleveland Clinic Foundation, Cleveland, Ohio 44106, USA.

13  
14      \*email: paul.tesar@case.edu  
15

16      **Mutations in *proteolipid protein 1 (PLP1)* result in failure of myelination and severe**  
17      **neurological dysfunction in the X-linked pediatric leukodystrophy Pelizaeus-Merzbacher**  
18      **disease (PMD). The majority of *PLP1* variants, including supernumerary copies and various**  
19      **point mutations, lead to early mortality. However, *PLP1*-null patients and mice display**  
20      **comparatively mild phenotypes, suggesting that reduction of aberrant *PLP1* expression**  
21      **might provide a therapeutic strategy across PMD genotypes. Here we show, CRISPR-Cas9**  
22      **mediated germline knockdown of *Plp1* in the severe *jimpy (Plp1<sup>jp</sup>)* point mutation mouse**  
23      **model of PMD rescued myelinating oligodendrocytes, nerve conduction velocity, motor**  
24      **function, and lifespan to wild-type levels, thereby validating *PLP1* suppression as a**  
25      **therapeutic approach. To evaluate the therapeutic potential of *Plp1* suppression in postnatal**  
26      **PMD mice, we tested antisense oligonucleotides (ASOs) that stably decrease mouse *Plp1***  
27      **mRNA and protein *in vivo*. Administration of a single intraventricular dose of *Plp1*-targeted**  
28      **ASOs to postnatal *jimpy* mice increased myelination, improved motor behavior, and**  
29      **extended lifespan through an 8-month endpoint. Collectively, these results support the**  
30      **development of *PLP1* suppression as a disease-modifying therapy for most PMD patients.**  
31      **More broadly, we demonstrate that RNA therapeutics can be delivered to oligodendrocytes**  
32      ***in vivo* to modulate neurological function and lifespan, opening a new treatment modality for**  
33      **myelin disorders.**

34 **Main text:**

35 Pelizaeus-Merzbacher disease (PMD; OMIM 312080) is an X-linked leukodystrophy  
36 typified by extensive hypomyelination of the central nervous system (CNS). Symptoms typically  
37 present early in childhood with a constellation of nystagmus, spasticity, hypotonia, and cognitive  
38 dysfunction, leading to mortality in early adulthood. In severe forms, symptoms present connatally  
39 and patients succumb to their disease in early childhood. Despite intense interest in PMD  
40 therapeutic development, including several clinical trials, no disease modifying therapies have  
41 proven efficacious in patients <sup>1-6</sup>.

42 Mutations in the *proteolipid protein 1* (*PLP1*; OMIM 300401) gene underlie the  
43 pathogenesis of PMD, with variability in disease onset and progression dictated by the severity of  
44 the particular mutation <sup>7-9</sup>. *PLP1* codes for the tetraspan protein PLP as well as its shorter splice  
45 isoform DM20, which lacks 35 amino acids in the cytosolic loop region <sup>10</sup>. PLP/DM20 is highly  
46 conserved across species, with human, mouse, and rat sharing identical amino acid sequence <sup>11</sup>.  
47 Expression of *PLP1* is largely restricted to myelinating oligodendrocytes, where it is responsible  
48 for ~50% of the total protein content of myelin <sup>12</sup>.

49 The majority of PMD cases result from duplications in *PLP1* yielding overexpression of  
50 otherwise normal PLP protein <sup>8</sup>. Additionally, hundreds of unique point mutations in *PLP1* which  
51 each generate abnormal PLP protein have also been discovered in patients with severe disease.  
52 Interestingly, while *PLP1* deletions are uncommon, null patients and mice display symptoms that  
53 are significantly delayed and more mild compared to those with duplications or point mutations <sup>13-</sup>  
54 <sup>15</sup>. Null patients can live until 40-60 years old <sup>8,16</sup>, do not develop lower body spastic paraparesis  
55 until the second or third decade of life, and do not demonstrate cognitive regression until the third  
56 or fourth decade of life (see Extended Data Table 1 for detailed clinical presentations of *PLP1*-  
57 null patients from published reports).

58 Collectively, this clinical landscape provides several potential opportunities for therapeutic  
59 development. While never tested, knockout or suppression of the duplicated copy of *PLP1* should,  
60 in theory, correct elevated protein expression to normal levels in patients harboring duplications.  
61 More globally, we suggest that the mild presentation of null patients provides rationale for a  
62 generalized *PLP1* suppression strategy that may provide clinical benefit beyond this single use  
63 case. Such an approach would provide comprehensive therapy to include the litany of point  
64 mutations that generate abnormal PLP protein, abrogating the need for personalized therapy  
65 tailored to each patient's severe, individual mutation.

66 To test this latter strategy, we evaluated *Plp1* suppression as a therapeutic approach for  
67 PMD using the *jimpy* (*Plp1<sup>jp</sup>*) mouse, which expresses a mutant PLP protein due to a point  
68 mutation in splice acceptor site of intron 4 of *Plp1*, leading to exon 5 skipping and a frameshift  
69 affecting the final 70 amino acids in the C-terminus of PLP/DM20. *Jimpy* mice exhibit severe  
70 neurological symptoms, die at 3 weeks of age, and accurately reflect the cellular and molecular  
71 pathology seen in human disease. To test if *Plp1* suppression was a valid therapeutic strategy for  
72 PMD we first utilized nuclease-mediated cleavage of DNA by clustered regularly interspaced short  
73 palindromic repeat-associated 9 (CRISPR-Cas9) protein<sup>17,18</sup> with synthetic guide RNAs (sgRNA)  
74 targeted to induce a frameshift in PLP1 exon 3 and trigger subsequent knockdown of *Plp1* mRNA  
75 by nonsense-mediated decay. *Plp1*-targeting sgRNAs were designed and tested for on-target  
76 cutting efficiency and two sgRNAs (3 and 7) were administered to knockdown *Plp1* by germline  
77 editing of *jimpy* mice (Fig. 1a). Concomitant administration of both sgRNAs with Cas9 mRNA  
78 from *Streptococcus pyogenes* (spCas9) in zygotes from crosses of *jimpy*-carrier females with wild-  
79 type males generated mice with high on-target mutation efficiency in *Plp1* (Extended Data Fig.  
80 1a). These founders included a *jimpy* male with complex deletion of 80 total nucleotides of DNA

81 in exon 3 of his single copy of *Plp1* on the X chromosome, resulting in a frameshift in exon 3 and  
82 an early termination codon in exon 4 (Fig. 1a and Extended Data Fig. 1b). This mouse denoted  
83 “CR-*impy*” (for CRISPR frameshift-mediated knockdown of *Plp1* in *jimpy*) showed no overt  
84 neurological phenotypes. A line of CR-*impy* was bred to evaluate cellular, molecular, and  
85 functional phenotypes, along with contemporaneous, isogenic wild-type and *jimpy* male mice.

86 As expected *jimpy* males displayed the typical pathological phenotypes including severe  
87 tremor, ataxia, seizures (lasting >30 seconds), and death by the third postnatal week (Fig. 1b,  
88 Supplementary Fig. 1, Supplementary Video 1). In contrast, CR-*impy* mice, which had a 61-74%  
89 reduction *Plp1* transcript expression in multiple brain regions (Extended Data Fig. 1c), showed a  
90 21-fold increase in lifespan (mean survival = 23 and 489 days in *jimpy* and CR-*impy*, respectively)  
91 with no overt tremor, ataxia, or evidence of seizures through the terminal endpoint at 18 months  
92 of age (Fig. 1b, Supplementary Fig. 1, Supplementary Video 1, and Supplementary Video 2).

93 Assessment of CR-*impy* mice at 3 weeks, 6 months, and 18 months of age by  
94 immunohistochemistry revealed a stable restoration of oligodendrocytes to near wild-type levels  
95 throughout the neuraxis, as evidenced by expression of the mature myelin marker myelin basic  
96 protein (MBP), and quantification of oligodendrocyte number using the oligodendrocyte-specific  
97 transcription factor myelin regulatory factor (MyRF) (Fig. 1c-e). Quantification of MBP protein  
98 by western blot and RNA by qRT-PCR further supported these findings, revealing 40-95%  
99 restoration of MBP at 3 weeks and full restoration of *Mbp* expression and MBP at 6 months of age  
100 across multiple brain regions in CR-*impy* mice compared to wild-type (Extended Data Fig. 1d-f).  
101 Restoration of oligodendrocytes in CR-*impy* mice grossly reduced reactivity of microglia and  
102 astrocytes normally seen in *jimpy* mice at 3 weeks of age, and was sustained into adulthood  
103 (Extended Data Fig. 2a, b). Finally, MBP+ CR-*impy* oligodendrocytes ensheathed phospho-

104 neurofilament+ axons in a similar manner to wild-type samples (Fig. 1f), suggestive of a  
105 potentially comparable myelination status.

106 Electron micrographs and tissue sections stained with toluidine blue demonstrated  
107 increased myelination in *CR-imp*y mice. Examination of optic nerves, which provide  
108 straightforward quantification of myelination from aligned axons, revealed a significant 6-fold  
109 improvement in the number and density of myelinated axons in *CR-imp*y animals, reaching 53%  
110 of wild-type levels at 3 weeks of age (Fig. 1g, h, and Extended Data Fig. 3a). Myelination in *CR-*  
111 *imp*y animals was sustained through 6 month and 18 month time points, approaching wild-type  
112 levels (Fig. 1i and Extended Data Fig. 3b, c). Additionally, examination of corpus callosum myelin  
113 at 3 weeks (Extended Data Fig. 3d) further revealed that these improvements were not restricted  
114 to the optic nerve but manifested throughout the neuraxis of *CR-imp*y mice.

115 Although the quantity of myelin increased drastically compared to *jimp*y, we noted that  
116 *CR-imp*y myelin sheaths were not quite as compact as those seen in age-matched wild type  
117 controls. To determine if restored myelin in *CR-imp*y mice was functional we used  
118 electrophysiology to measure conduction velocity in the optic nerve at two time points. At 3 weeks  
119 of age we found a significant 2.6- and 1.7-fold increase in 1<sup>st</sup> and 2<sup>nd</sup> peak conduction velocities,  
120 respectively, in *CR-imp*y mice compared to *jimp*y. Intriguingly, these values trailed wild-type  
121 conduction velocities, a finding consistent with our quantitative electron microscopy showing an  
122 incomplete restoration of myelinated axons at the 3 week time point. However, over time this  
123 discrepancy disappeared and by 6 months of age we found no significant difference in optic nerve  
124 conduction velocity in *CR-imp*y mice relative to wild-type (Fig. 2a, b), suggesting that suppression  
125 of *Plp1* does not impair myelin function.

126 Finally, we wanted to determine if the widespread restoration of CR-*imp*y oligodendrocytes  
127 resulted in a meaningful recovery of motor performance using the accelerating rotarod and open  
128 field behavioral assays at 3 weeks, 2 months, 6 months, and 18 months of age. In rotarod testing,  
129 which measures motor learning, function, and coordination, CR-*imp*y mice showed equivalent  
130 performance to wild-type up through 6 months of age. At the final 18 month time point we noted  
131 a slight decrease in CR-*imp*y performance relative to wild-type (Fig. 2c). This is consistent with  
132 prior reports in mice with complete *Plp1* knockout in otherwise wild-type mice, which showed a  
133 decline in rotarod performance in late adulthood relative to wild-type due to long tract axon  
134 degeneration<sup>13</sup>. Overall locomotion of CR-*imp*y mice in open field testing was equivalent to wild-  
135 type at all time points tested (Fig. 2d). Together, these results establish that frameshift-mediated  
136 knockdown of mutant *Plp1* in PMD mice prevents disease with near complete restoration of  
137 oligodendrocytes, functional myelin, and lifespan.

138 PMD is thought to result from a cell-intrinsic deficit within the oligodendrocyte lineage<sup>19</sup>-  
139 <sup>23</sup>. In the CNS, PLP (protein) is restricted to oligodendrocytes, but *Plp1* transcript and transgene  
140 expression have been reported in a few neuronal subsets<sup>24</sup>. Since CR-*imp*y mice have constitutive  
141 germline *Plp1* knockdown in all cells, we generated and validated induced pluripotent stem cells  
142 (iPSCs) from isogenic wild-type, CR-*imp*y, and *jimp*y mice (Extended Data Fig. 4a, b) to generate  
143 pure populations of oligodendrocyte progenitor cells (OPCs) and assess the cell type specific effect  
144 of *Plp1* knockdown, *in vitro*<sup>25,26</sup>. OPCs expressing the canonical transcription factors Olig2 and  
145 Sox10 (Extended Data Fig. 4c, d) were stimulated to differentiate towards an oligodendrocyte fate  
146 by addition of thyroid hormone, and MBP+ oligodendrocytes were quantified. As expected<sup>22</sup>,  
147 *jimp*y cultures contained only rare surviving MBP+ oligodendrocytes with a concomitant loss in  
148 total cells (Fig. 3a-c). In contrast CR-*imp*y cultures showed a complete rescue of MBP+

149 oligodendrocytes as well as total cells (Fig. 3a-c). These results suggest that oligodendrocyte  
150 restoration in *CR-imp* mice is due to an amelioration of intrinsic cellular pathology within the  
151 oligodendrocyte lineage.

152 After genetically validating *Plp1* knockdown as a therapeutic target for disease-  
153 modification in PMD, we pursued a clinically translatable strategy for *in vivo*, postnatal  
154 suppression of *Plp1*. While postnatal delivery of CRISPR-based therapeutics has demonstrated  
155 pre-clinical efficacy in a separate CNS disorder<sup>27</sup>, delivery challenges, off-target risks<sup>28,29</sup>, and  
156 the potential to generate more severe, in-frame mutations due to imprecise repair<sup>30,31</sup> led us to  
157 employ anti-sense oligonucleotides (ASOs) to test suppression of *Plp1*. ASOs are short single-  
158 stranded oligodeoxynucleotides with chemical modifications that confer enhanced  
159 pharmacological properties including robust *in vivo* stability, target affinity, and cellular uptake  
160 when delivered directly to the CNS since they do not cross the blood-brain barrier<sup>32,33</sup>. ASOs bind  
161 to their target RNAs through complementary base pairing and can be designed to modify RNA  
162 splicing or form an ASO/RNA hybrid that is recognized by RNase H1, leading to cleavage of the  
163 target transcript and concomitant reduction in protein expression. Recently, ASOs have shown  
164 remarkable efficacy in several animal models of neuron-based CNS disorders and human spinal  
165 muscular atrophy patients, the latter leading to the first FDA-approved therapy for this disease<sup>34-</sup>  
166<sup>44</sup>. Whether ASOs could be delivered to oligodendrocytes *in vivo* and mediate functional  
167 improvement in the context of myelin disease was unknown.

168 We tested two separate RNase H ASOs targeting the 5<sup>th</sup> intron (ASO *Plp1.a*) and 3'UTR  
169 (ASO *Plp1.b*) of *Plp1* (Fig. 4a). Administration of ASO *Plp1.a* or ASO *Plp1.b* by  
170 intracerebroventricular (ICV) injection robustly reduced *Plp1* expression by 93% and 86% in the  
171 cortex and 97% and 94% in the spinal cord of adult wild-type mice, respectively (Extended Data

172 Fig. 5a). Both of these *Plp1*-targeting ASOs were well-tolerated based on CNS histology and lack  
173 of alteration or reactivity of glial and immune cell markers by qRT-PCR and  
174 immunohistochemistry 8 weeks after dosing adult wild-type mice (Extended Data Fig. 5b-f).

175 Administration of ASO *Plp1.a*, ASO *Plp1.b*, or a non-targeting control ASO by ICV  
176 injection to male pups after birth revealed widespread distribution and stability of ASOs  
177 throughout the neuraxis in both wild-type and *jimpy* mice based on whole-brain  
178 immunohistochemical staining at 3 weeks (Fig. 4a, b, and Extended Data Fig. 6a, b). In wild-type  
179 mice, *Plp1*-targeting ASOs delivered with this single dose treatment regimen showed robust  
180 reductions in *Plp1* transcript by 46-90% and PLP protein by 47-63% across multiple CNS regions,  
181 but importantly had no effect on MBP protein levels or overt phenotype (Extended Data Fig. 7a-c  
182 and Supplementary Fig. 3). As expected, *jimpy* mice treated with non-targeting control ASO and  
183 those left untreated succumbed to their disease at the third postnatal week (Fig. 4c). However,  
184 *jimpy* mice treated after birth with a single ICV dose of *Plp1*-targeting ASOs (*Plp1.a* or *Plp1.b*)  
185 induced a remarkable extension of lifespan, to our terminal endpoint of 8 months of age (when all  
186 animals were processed for histology) (Fig. 4b, c, Supplementary Fig. 3, Supplementary Video 3,  
187 and Supplementary Video 4).

188 Treatment with *Plp1*-targeting ASOs increased oligodendrocytes in *jimpy* animals by 3  
189 weeks of age, notably in the brainstem, which was sustained through the 8 month terminal end  
190 point without additional ASO dosing or other intervention (Fig. 4d-f and Extended Data Fig. 7d,  
191 e). Electron micrographs and tissue sections stained with toluidine blue confirmed that some  
192 myelinated axons were still present even 8 months post-treatment, but overall myelination was  
193 reduced relative to wild-type controls (Fig. 4g, h). Symptomatically, *Plp1*-targeting ASO-treated  
194 *jimpy* mice showed only minor PMD pathological phenotypes, including slight tremor and



195 occasional short duration seizures (<15 seconds), but otherwise appeared overtly normal in daily  
196 activities including the ability to breed, which has not previously been achieved by a *jimpy* male  
197 mouse (Supplementary Fig. 3). Rotarod performance of *Plp1*-targeting ASO-treated *jimpy* mice  
198 lagged below wild-type levels, but, strikingly, overall locomotion was restored to wild-type levels  
199 across 2 month, 4 month, and 6 month time points (Fig. 4i, j). Together these data demonstrate that  
200 a single postnatal administration of ASOs elicits a sustained reduction in *Plp1* expression and  
201 dramatically improves myelination, motor performance, and lifespan in a severe point mutation  
202 model of PMD.

203 In summary, we have shown CRISPR- and ASO-mediated rescue of PMD in the severely  
204 affected *jimpy* mouse model through two independent, technological modalities to achieve mutant  
205 *Plp1* suppression. We demonstrate that RNA-based drugs can be used to modulate a disease target  
206 in oligodendrocytes to restore both functional myelin and lifespan in the context of a severe genetic  
207 disorder. These results provide powerful foundational data for the development of clinically  
208 relevant ASO technology to achieve postnatal reduction of *Plp1*. While further pre-clinical  
209 development is needed to optimize the dosing regimen, our results highlight that even a single  
210 ASO treatment can elicit a profound and sustained phenotypic improvement.

211 The genetic spectrum of PMD patients encompasses hundreds of unique mutations. Our  
212 data nominates a mutation-agnostic approach to collapse this heterogeneity through suppression  
213 of *PLP1*, potentially abrogating the need for per-patient, personalized therapies. Importantly, while  
214 mice display minimal phenotype when *Plp1* is knocked out<sup>13,14,45</sup>, *PLP1*-null patients present with  
215 neurological disease, but with considerably later onset, slower progression, and improved clinical  
216 outcomes. While careful titration of normal *PLP1* expression to wild-type levels could be curative  
217 for the majority of patients who harbor gene duplications, reducing mutant *PLP1* in patients with

218 point mutations, while not a full cure, may provide substantial improvement for this disease, which  
219 currently has no viable treatment options. Collectively our studies, combined with the feasibility  
220 of ASO delivery to the human CNS and current safety data in other CNS indications, support  
221 advancement of *PLP1* suppression into the clinic as a disease modifying therapeutic with potential  
222 universal applicability to PMD patients. More broadly, our data provide a framework to modulate  
223 pathogenic genes or mRNAs in OPCs and oligodendrocytes in order to restore myelination and  
224 neurological function in additional genetic and sporadic disorders of myelin.

### 225 **References:**

- 226 1 Goldman, S. A., Nedergaard, M. & Windrem, M. S. Glial progenitor cell-based treatment  
227 and modeling of neurological disease. *Science* **338**, 491-495,  
228 doi:10.1126/science.1218071 (2012).
- 229 2 Gupta, N. *et al.* Neural stem cell engraftment and myelination in the human brain. *Sci*  
230 *Transl Med* **4**, 155ra137, doi:10.1126/scitranslmed.3004373 (2012).
- 231 3 Saher, G. *et al.* Therapy of Pelizaeus-Merzbacher disease in mice by feeding a  
232 cholesterol-enriched diet. *Nat Med* **18**, 1130-1135, doi:10.1038/nm.2833 (2012).
- 233 4 Prukop, T. *et al.* Progesterone antagonist therapy in a Pelizaeus-Merzbacher mouse  
234 model. *Am J Hum Genet* **94**, 533-546, doi:10.1016/j.ajhg.2014.03.001 (2014).
- 235 5 Wishnew, J. *et al.* Umbilical cord blood transplantation to treat Pelizaeus-Merzbacher  
236 Disease in 2 young boys. *Pediatrics* **134**, e1451-1457, doi:10.1542/peds.2013-3604  
237 (2014).
- 238 6 Tantzer, S., Sperle, K., Kenaley, K., Taube, J. & Hobson, G. M. Morpholino Antisense  
239 Oligomers as a Potential Therapeutic Option for the Correction of Alternative Splicing in  
240 PMD, SPG2, and HEMS. *Mol Ther Nucleic Acids* **12**, 420-432,  
241 doi:10.1016/j.omtn.2018.05.019 (2018).
- 242 7 Cailloux, F. *et al.* Genotype-phenotype correlation in inherited brain myelination defects  
243 due to proteolipid protein gene mutations. Clinical European Network on Brain  
244 Dysmyelinating Disease. *Eur J Hum Genet* **8**, 837-845, doi:10.1038/sj.ejhg.5200537  
245 (2000).
- 246 8 Inoue, K. PLP1-related inherited dysmyelinating disorders: Pelizaeus-Merzbacher disease  
247 and spastic paraplegia type 2. *Neurogenetics* **6**, 1-16, doi:10.1007/s10048-004-0207-y  
248 (2005).
- 249 9 Hobson, G. M. & Garbern, J. Y. Pelizaeus-Merzbacher disease, Pelizaeus-Merzbacher-  
250 like disease 1, and related hypomyelinating disorders. *Semin Neurol* **32**, 62-67,  
251 doi:10.1055/s-0032-1306388 (2012).
- 252 10 Nave, K. A., Lai, C., Bloom, F. E. & Milner, R. J. Splice site selection in the proteolipid  
253 protein (PLP) gene transcript and primary structure of the DM-20 protein of central  
254 nervous system myelin. *Proceedings of the National Academy of Sciences of the United*  
255 *States of America* **84**, 5665-5669 (1987).

- 256 11 Garbern, J. Y. Pelizaeus-Merzbacher disease: Genetic and cellular pathogenesis. *Cell Mol*  
257 *Life Sci* **64**, 50-65, doi:10.1007/s00018-006-6182-8 (2007).
- 258 12 Baumann, N. & Pham-Dinh, D. Biology of oligodendrocyte and myelin in the  
259 mammalian central nervous system. *Physiol Rev* **81**, 871-927 (2001).
- 260 13 Griffiths, I. *et al.* Axonal swellings and degeneration in mice lacking the major  
261 proteolipid of myelin. *Science* **280**, 1610-1613 (1998).
- 262 14 Klugmann, M. *et al.* Assembly of CNS myelin in the absence of proteolipid protein.  
263 *Neuron* **18**, 59-70 (1997).
- 264 15 Garbern, J. Y. *et al.* Patients lacking the major CNS myelin protein, proteolipid protein 1,  
265 develop length-dependent axonal degeneration in the absence of demyelination and  
266 inflammation. *Brain* **125**, 551-561 (2002).
- 267 16 Hobson, G. M. & Kamholz, J. in *GeneReviews((R))* (eds M. P. Adam *et al.*) (1993).
- 268 17 Jinek, M. *et al.* A programmable dual-RNA-guided DNA endonuclease in adaptive  
269 bacterial immunity. *Science* **337**, 816-821, doi:10.1126/science.1225829 (2012).
- 270 18 Cong, L. *et al.* Multiplex genome engineering using CRISPR/Cas systems. *Science* **339**,  
271 819-823, doi:10.1126/science.1231143 (2013).
- 272 19 Dhaunchak, A. S. & Nave, K. A. A common mechanism of PLP/DM20 misfolding  
273 causes cysteine-mediated endoplasmic reticulum retention in oligodendrocytes and  
274 Pelizaeus-Merzbacher disease. *Proceedings of the National Academy of Sciences of the*  
275 *United States of America* **104**, 17813-17818, doi:10.1073/pnas.0704975104 (2007).
- 276 20 Gow, A., Southwood, C. M. & Lazzarini, R. A. Disrupted proteolipid protein trafficking  
277 results in oligodendrocyte apoptosis in an animal model of Pelizaeus-Merzbacher disease.  
278 *J Cell Biol* **140**, 925-934 (1998).
- 279 21 Nevin, Z. S. *et al.* Modeling the Mutational and Phenotypic Landscapes of Pelizaeus-  
280 Merzbacher Disease with Human iPSC-Derived Oligodendrocytes. *Am J Hum Genet* **100**,  
281 617-634, doi:10.1016/j.ajhg.2017.03.005 (2017).
- 282 22 Elitt, M. S. *et al.* Chemical Screening Identifies Enhancers of Mutant Oligodendrocyte  
283 Survival and Unmasks a Distinct Pathological Phase in Pelizaeus-Merzbacher Disease.  
284 *Stem Cell Reports* **11**, 711-726, doi:10.1016/j.stemcr.2018.07.015 (2018).
- 285 23 Luders, K. A., Patzig, J., Simons, M., Nave, K. A. & Werner, H. B. Genetic dissection of  
286 oligodendroglial and neuronal Plp1 function in a novel mouse model of spastic paraplegia  
287 type 2. *Glia* **65**, 1762-1776, doi:10.1002/glia.23193 (2017).
- 288 24 Miller, M. J., Kangas, C. D. & Macklin, W. B. Neuronal expression of the proteolipid  
289 protein gene in the medulla of the mouse. *J Neurosci Res* **87**, 2842-2853,  
290 doi:10.1002/jnr.22121 (2009).
- 291 25 Lager, A. M. *et al.* Rapid functional genetics of the oligodendrocyte lineage using  
292 pluripotent stem cells. *Nat Commun* **9**, 3708, doi:10.1038/s41467-018-06102-7 (2018).
- 293 26 Najm, F. J. *et al.* Rapid and robust generation of functional oligodendrocyte progenitor  
294 cells from epiblast stem cells. *Nature methods* **8**, 957-962, doi:10.1038/nmeth.1712  
295 (2011).
- 296 27 Lee, B. *et al.* Nanoparticle delivery of CRISPR into the brain rescues a mouse model of  
297 fragile X syndrome from exaggerated repetitive behaviours. *Nature Biomedical*  
298 *Engineering*, doi:10.1038/s41551-018-0252-8 (2018).
- 299 28 Anderson, K. R. *et al.* CRISPR off-target analysis in genetically engineered rats and  
300 mice. *Nature methods* **15**, 512-514, doi:10.1038/s41592-018-0011-5 (2018).

- 301 29 Tsai, S. Q. & Joung, J. K. Defining and improving the genome-wide specificities of  
302 CRISPR-Cas9 nucleases. *Nature reviews. Genetics* **17**, 300-312, doi:10.1038/nrg.2016.28  
303 (2016).
- 304 30 Kosicki, M., Tomberg, K. & Bradley, A. Repair of double-strand breaks induced by  
305 CRISPR-Cas9 leads to large deletions and complex rearrangements. *Nature*  
306 *biotechnology* **36**, 765-771, doi:10.1038/nbt.4192 (2018).
- 307 31 van Overbeek, M. *et al.* DNA Repair Profiling Reveals Nonrandom Outcomes at Cas9-  
308 Mediated Breaks. *Molecular cell* **63**, 633-646, doi:10.1016/j.molcel.2016.06.037 (2016).
- 309 32 Rinaldi, C. & Wood, M. J. A. Antisense oligonucleotides: the next frontier for treatment  
310 of neurological disorders. *Nat Rev Neurol* **14**, 9-21, doi:10.1038/nrneurol.2017.148  
311 (2018).
- 312 33 Bennett, C. F., Baker, B. F., Pham, N., Swayze, E. & Geary, R. S. Pharmacology of  
313 Antisense Drugs. *Annu Rev Pharmacol Toxicol* **57**, 81-105, doi:10.1146/annurev-  
314 pharmtox-010716-104846 (2017).
- 315 34 Finkel, R. S. *et al.* Treatment of infantile-onset spinal muscular atrophy with nusinersen:  
316 a phase 2, open-label, dose-escalation study. *Lancet* **388**, 3017-3026, doi:10.1016/S0140-  
317 6736(16)31408-8 (2016).
- 318 35 Hagemann, T. L. *et al.* Antisense suppression of glial fibrillary acidic protein as a  
319 treatment for Alexander disease. *Ann Neurol* **83**, 27-39, doi:10.1002/ana.25118 (2018).
- 320 36 Finkel, R. S. *et al.* Nusinersen versus Sham Control in Infantile-Onset Spinal Muscular  
321 Atrophy. *N Engl J Med* **377**, 1723-1732, doi:10.1056/NEJMoa1702752 (2017).
- 322 37 Kordasiewicz, H. B. *et al.* Sustained therapeutic reversal of Huntington's disease by  
323 transient repression of huntingtin synthesis. *Neuron* **74**, 1031-1044,  
324 doi:10.1016/j.neuron.2012.05.009 (2012).
- 325 38 Crooke, S. T., Witztum, J. L., Bennett, C. F. & Baker, B. F. RNA-Targeted Therapeutics.  
326 *Cell Metab* **27**, 714-739, doi:10.1016/j.cmet.2018.03.004 (2018).
- 327 39 DeVos, S. L. *et al.* Tau reduction prevents neuronal loss and reverses pathological tau  
328 deposition and seeding in mice with tauopathy. *Sci Transl Med* **9**,  
329 doi:10.1126/scitranslmed.aag0481 (2017).
- 330 40 Miller, T. M. *et al.* An antisense oligonucleotide against SOD1 delivered intrathecally for  
331 patients with SOD1 familial amyotrophic lateral sclerosis: a phase 1, randomised, first-in-  
332 man study. *Lancet Neurol* **12**, 435-442, doi:10.1016/S1474-4422(13)70061-9 (2013).
- 333 41 Becker, L. A. *et al.* Therapeutic reduction of ataxin-2 extends lifespan and reduces  
334 pathology in TDP-43 mice. *Nature* **544**, 367-371, doi:10.1038/nature22038 (2017).
- 335 42 Meng, L. *et al.* Towards a therapy for Angelman syndrome by targeting a long non-  
336 coding RNA. *Nature* **518**, 409-412, doi:10.1038/nature13975 (2015).
- 337 43 Passini, M. A. *et al.* Antisense oligonucleotides delivered to the mouse CNS ameliorate  
338 symptoms of severe spinal muscular atrophy. *Sci Transl Med* **3**, 72ra18,  
339 doi:10.1126/scitranslmed.3001777 (2011).
- 340 44 Scoles, D. R. *et al.* Antisense oligonucleotide therapy for spinocerebellar ataxia type 2.  
341 *Nature* **544**, 362-366, doi:10.1038/nature22044 (2017).
- 342 45 Gould, E. A. *et al.* Mild myelin disruption elicits early alteration in behavior and  
343 proliferation in the subventricular zone. *eLife* **7**, doi:10.7554/eLife.34783 (2018).
- 344 46 Hsu, P. D. *et al.* DNA targeting specificity of RNA-guided Cas9 nucleases. *Nature*  
345 *biotechnology* **31**, 827-832, doi:10.1038/nbt.2647 (2013).

- 346 47 Nakagata, N., Okamoto, M., Ueda, O. & Suzuki, H. Positive effect of partial zona-  
347 pellucida dissection on the in vitro fertilizing capacity of cryopreserved C57BL/6J  
348 transgenic mouse spermatozoa of low motility. *Biol Reprod* **57**, 1050-1055 (1997).  
349 48 Schmid-Burgk, J. L. *et al.* OutKnocker: a web tool for rapid and simple genotyping of  
350 designer nuclease edited cell lines. *Genome Res* **24**, 1719-1723,  
351 doi:10.1101/gr.176701.114 (2014).  
352 49 Glascock, J. J. *et al.* Delivery of therapeutic agents through intracerebroventricular (ICV)  
353 and intravenous (IV) injection in mice. *J Vis Exp*, doi:10.3791/2968 (2011).

354 **Acknowledgments** This research was supported, in part, by grants from the NIH R01NS093357  
355 (P.J.T.), T32GM007250 (M.S.E, Z.S.N., K.C.A), and F30HD084167 (Z.S.N.); the New York Stem  
356 Cell Foundation (P.J.T); the European Leukodystrophy Association (P.J.T.); and philanthropic  
357 contributions from the Geller, Goodman, Fakhouri, Long, Peterson, and Weidenthal families.  
358 Additional support was provided by the Genomics, Small Molecule Drug Development, and  
359 Rodent Behavioral core facilities of the Case Western Reserve University (CWRU)  
360 Comprehensive Cancer Center (P30CA043703), the CWRU Light Microscopy Imaging Center  
361 (S10-OD016164), and the electron microscopy division of the Cleveland Clinic Lerner Research  
362 Institute Imaging Core. We are grateful to Lynn Landmesser, Robert Miller, Peter Scacheri, Tony  
363 Wynshaw-Boris, Ben Clayton, Simone Edelheit, Alex Miron, Hiroyuki Arakawa, Lucille Hu,  
364 Chris Allan, and Jared Cregg for technical assistance and discussion.

365 **Author contributions** M.S.E. and P.J.T. conceived and managed the overall study. H.E.S and  
366 M.S.E. maintained the animal colonies, tracked survival, and harvested animal tissues. M.S.E.  
367 captured video recordings. L.B. and M.S.E. designed and tested sgRNAs. D.F.L., R.A.C., and W.J.  
368 performed zygote electroporation and oviduct transfers. H.E.S., B.S.N., K.C.A., and L.B.  
369 performed western blotting and protein quantitation. B.E.P, L.B., and K.C.A. performed qRT-  
370 PCR. M.M., B.S.N, L.B., H.E.S., and M.S.E. generated the immunohistochemistry data. Y.M.  
371 performed optic nerve electrophysiology studies. Y.M., M.H., and H.E.S. processed samples for  
372 histology and electron microscopy and analyzed images. M.S.E, K.C.A., B.S.N., and L.B.  
373 performed animal behavior. M.S.E., B.S.N., and H.E.O. generated and characterized iPSCs and  
374 OPCs in vitro. B.E.P. and F.R. designed and characterized ASOs, tested tolerability in adult mice,  
375 recommended the use of ASOs, and contributed to the study design and interpretation of results in  
376 the ASO-treated disease model. M.S.E. performed ASO injections in pups. Z.S.N. contributed key  
377 components to experimental design, data analysis, and manuscript composition. M.S.E., M.M.,  
378 L.B., and P.J.T. assembled figures. M.S.E. and P.J.T. wrote the manuscript with input from all  
379 authors.

380 **Competing interests** P.J.T. is a co-founder and consultant for Convelo Therapeutics, which has  
381 licensed patents from CWRU inventors (P.J.T., M.S.E., Z.S.N., and M.M.). P.J.T. and CWRU  
382 retain equity in Convelo Therapeutics. P.J.T. is a consultant and on the Scientific Advisory Board  
383 of Cell Line Genetics, which performed karyotyping in this study. P.J.T. is Chair of the Scientific  
384 Advisory Board (volunteer position) for the Pelizaeus-Merzbacher Disease Foundation. B.E.P. and  
385 F.R. are employees of Ionis Pharmaceuticals. No other authors declare competing interests.

386 **Data availability** All data generated or analyzed during this study are included in this article and  
387 its supplementary information files. Source data for animal survival cohorts in Figs. 1b, 2c, d, and  
388 4c, i, j and are provided in Supplementary Figs. 1 and 3. Raw annotated western blot images for  
389 Extended Data Fig. 1d, f and Extended Data Fig. 7b, c, e are provided as Supplementary Figs. 2  
390 and 4. Animals and iPSC lines are available from P.J.T. upon request.

391 **Materials and Methods:**

392 **Mice.** All procedures were in accordance with the National Institutes of Health Guidelines for the  
393 Care and Use of Laboratory Animals and were approved by the Case Western Reserve University  
394 Institutional Animal Care and Use Committee (IACUC).

395  
396 Wildtype (B6CBACa-Aw-J/A) and *jimpy* (B6CBACa-Aw-J/A-Plp1<sup>jp</sup> EdaTa/J) mice used in this  
397 study were purchased from Jackson Laboratory (Bar Harbor, ME). *Jimpy* males exhibit severe  
398 neurological phenotypes and die around 3 weeks of age due to mutations in *Plp1* on the X-  
399 chromosome. The colony was maintained by breeding heterozygous females, which lack a  
400 phenotype, to wild-type males to generate affected *jimpy* males. Mice were housed under a  
401 temperature-controlled environment, 12-h light-dark cycle with ad libitum access to water and  
402 rodent chow. All mice were genotyped at ~postnatal day 7 using genomic DNA isolated from tail  
403 tips or toes at two loci: 1) the *jimpy* mutation (NM\_011123.4:c.623-2A>G) in *Plp1* intron 4, which  
404 causes skipping of exon 5 and a truncated PLP protein and 2) the complex indel in *Plp1* exon 3  
405 from dual cutting of CRISPR/spCas9 sgRNAs in “CR-*impy*” mice (c.[242\_318del; 328\_330del]).  
406 This “knockdown” causes a frameshift in *Plp1*, a premature stop codon in exon 4, and is predicted  
407 to cause nonsense mediated decay of the transcript and loss of protein. Genotyping was performed  
408 by standard Sanger sequencing or a custom real time PCR assays (Probe identifiers: Plp1-2 Mut  
409 [for *jimpy* mutation in intron 4] and Plp1-5 WT [for CR-*impy* complex deletion in exon 3],  
410 Transnetyx, Cordova, TN).

411 Primers for Sanger sequencing included:

412 *jimpy* Forward: AACGCAAAGCAGCACATTTCA

413 *jimpy* Reverse: AGTGCAGCTCTGGGGTTAAT

414 CR-*impy* Forward: TCTGTCTGTCCATGCAGGATT

415 CR-*impy* Reverse: GACACACCCGCTCCAAAGAA

416

417 ***Plp1*-targeting sgRNA design.** Mouse *Plp1* sequence was entered into the spCas9 CRISPR  
418 sgRNA design tool at [crispr.mit.edu](http://crispr.mit.edu) <sup>46</sup> and analyzed against the mm10 target genome. *Plp1*-  
419 targeting sgRNAs were sorted based on their on-target efficiency while minimizing off-target  
420 mutations. On-target nuclease activity was confirmed for each sgRNA using the Guide-it sgRNA  
421 Screening Kit (631440, Clontech) according to the manufacturer's instructions. The following  
422 sgRNAs were tested, and sgRNAs 3 and 7 were selected for combined use in zygote studies based  
423 on localization within the gene, proximity to each other, and ability to target *Plp1*, including its  
424 splice isoform *Dm20*:

425 sgRNA1: CCCCTGTTACCGTTGCGCTC

426 sgRNA2: TGGCCACCAGGGAAGCAAAG

427 sgRNA3: AAGACCACCATCTGCGGCAA

428 sgRNA4: GGCCTGAGCGCAACGGTAAC

429 sgRNA5: GCCTGAGCGCAACGGTAACA

430 sgRNA6: TCTACACCACCGGCGCAGTC

431 sgRNA7: CCAGCAGGAGGGCCCCATAA

432 sgRNA8: GAAGGCAATAGACTGACAGG

433

434 **Knockdown of *Plp1* in *jimpy* zygotes using CRISPR-Cas9.** Carrier female oocyte donors were  
435 administered 5 IU pregnant mare's serum gonadotropin by intraperitoneal injection (G4877,  
436 Sigma-Aldrich), followed by 2.5 IU human chorionic gonadotropin (GC10, Sigma-Aldrich) 48

437 hours later. These superovulated females were mated to wild-type males. Zygotes were harvested  
438 in FHM medium (MR-025 Sigma-Aldrich) with 0.1% hyaluronidase (H3501, Sigma-Aldrich) and  
439 the surrounding cumulus cells were separated. The zona pellucida of each zygote was partially  
440 dissected using 0.3M sucrose (S7903, Sigma-Aldrich) in FHM as previously described <sup>47</sup>.

441  
442 Zygotes were placed in 2x KSOM medium (MR-106, Sigma-Aldrich) with an equal volume  
443 of solution containing 100ng/uL sgRNA3, 100ng/uL sgRNA7 (AR01, PNAbio), and 200ng/uL  
444 spCas9 mRNA (CR01, PNAbio). Electroporation was performed in a chamber with a 1mm gap  
445 between two electrodes using an ECM 830 Square Wave Electroporation System (BTX).  
446 Electroporation parameters were set as follows: 32V, 3ms pulse duration, 5 repeats, and 100ms  
447 inter-pulse interval. Electroporated zygotes were moved to KSOM medium and then transferred  
448 into the oviducts of pseudopregnant females (CD1). Electroporation settings were optimized to  
449 achieve maximal cutting efficiency in a separate strain but resulted in a higher rate of embryo loss  
450 in our B6CBACa/J strain. Zygotes were electroporated in batches of 54, 56, and 61, which resulted  
451 in 4, 3, and 0 pups born. The 7 surviving mice were genotyped after birth and monitored daily for  
452 onset of typical *jimpy* phenotypes including tremors, seizures, and early death by postnatal day 21.  
453 A founder *jimpy* male with complex deletion containing 80-bp of total deleted sequence in exon 3  
454 of *Plp1*, denoted “CR-*impy*” for CRISPR frameshift-mediated knockdown of *Plp1* in *jimpy*,  
455 showed no overt phenotype and was backcrossed for two generations to the wild-type parental  
456 strain to reduce potential off-target Cas9 cutting effects (Extended Data Fig. 1b). A colony of mice  
457 was bred to evaluate cellular, molecular, and functional phenotypes of contemporaneous isogenic  
458 wild-type, *jimpy*, and CR-*impy* male mice. Mice were monitored daily to determine lifespan with  
459 statistical significance among groups determined using the log-rank test. Additionally, animals



460 surviving beyond 3 weeks were analyzed using behavioral (rotarod and open field testing for motor  
461 performance), histology (immunostaining of the CNS for myelin proteins and electron microscopy  
462 for myelin ultrastructure), and electrophysiology (conduction velocity of the optic nerve). Details  
463 and metadata for all mice in this study including censoring of animals in the survival analysis are  
464 found in Supplementary Fig. 1.

465  
466 **CRISPR on- and off-target assessment.** CRISPR on- and off-target cutting efficiencies were  
467 assessed by high throughput sequencing. PCR primers were designed to encompass each guide on-  
468 target site, as well as each top predicted off-target site from the spCas9 CRISPR sgRNA design  
469 tool at [crispr.mit.edu](http://crispr.mit.edu) <sup>46</sup>. Primer sequences were generated using NCBI Primer-BLAST:

| PCR amplicon      | Genomic Location                | Forward Primer        | Reverse Primer         |
|-------------------|---------------------------------|-----------------------|------------------------|
| sgRNA on-target   | <i>Plp1</i> exon 3              | TCTGTCTGTCCATGCAGGATT | GACACACCCGCTCCAAAGAA   |
| sgRNA3 off-target | Intronic ( <i>Shf</i> , chr. 2) | TGGGTAGGACAGACAAAGGA  | ACAAGGTCATACACACTCAGGC |
| sgRNA7 off-target | Intergenic (chr. 6)             | ACGACCAGACTGCAGATGAAA | TACCCCCAGCACTTGACGAT   |

470

471 Tails were added to each primer sequence:

472 Forward: TCCCTACACGACGCTCTTCCGATCT

473 Reverse: AGTTCAGACGTGTGCTCTTCCGATCT

474

475 PCR amplification was performed using the KAPA HiFi HotStart ReadyMix (07958935001,  
476 Roche) to minimize PCR-based error. Libraries were prepared by adding unique indices by PCR  
477 using KAPA HiFi HotStart ReadyMix. All libraries were pooled evenly and quantified using  
478 NEBNext® Library Quant Kit for Illumina® (E7630, New England Biolabs) then denatured and  
479 diluted per Illumina's MiSeq instructions. 250bp paired-end sequencing was performed using an

480 Illumina MiSeq at the Case Western Reserve University School of Medicine Genomics Core  
481 Facility. Reads were compared against the consensus sequence and CRISPR-induced indel  
482 percentages were determined using the OutKnocker tool at [outknocker.org](http://outknocker.org)<sup>48</sup>.

483

484 **Video recording of mouse phenotypes.** All recording was performed using video recording  
485 function on an iPhone (Apple). Videos were color corrected, stabilized, and trimmed to a discrete  
486 range using iMovie (Apple). Videos were collated and converted to MP4 format using Adobe After  
487 Effects.

488

489 **Immunohistochemistry.** Mice were anesthetized with isoflurane and sacrificed by transcardial  
490 perfusion with PBS followed by 4% paraformaldehyde (PFA; 15710, Electron Microscopy  
491 Sciences). Tissue was harvested and placed in 4% PFA overnight at 4°C. Samples were rinsed  
492 with PBS, equilibrated in 30% sucrose, and frozen in Tissue-Tek® Optimum Cutting Temperature  
493 compound (O.C.T.; 25608-930, VWR). Samples were cryosectioned at a 20µm thickness. Sections  
494 were washed in phosphate-buffered saline (PBS) and incubated overnight in antibody solution  
495 containing 2.5% normal donkey serum (NDS; 017-000-121, Jackson Labs) and 0.25% Triton X-  
496 100 (Sigma: T8787). For MBP immunohistochemistry, sections were post fixed in methanol at -  
497 20°C for 20 minutes followed by overnight incubation in a PBS based primary antibody solution  
498 containing 0.1% Saponin and 2.5% normal donkey serum. Sections were stained using the  
499 following antibodies at the indicated concentrations or dilutions: mouse anti-MBP (2µg/mL,  
500 808401, Biolegend), rabbit anti-MyRF antibody (1:500; kindly provided by Dr. Michael Wegner),  
501 rat anti-PLP (1:500; Lerner Research Institute Hybridoma Core, Cleveland, OH), goat anti-Sox10  
502 (0.4µg/mL, AF2864, R&D Systems), rabbit anti-GFAP (1:1000; Z033429-2, Dako), goat anti-

503 IBA1 (0.1mg/mL, ab5076, Abcam), anti-phospho-neurofilament (2ug/ml, 801601, BioLegend),  
504 and rabbit anti-ASO (1:2500; Ionis Pharmaceuticals). Secondary immunostaining was performed  
505 with Alexa Fluor® antibodies (ThermoFisher) used at 1ug/ml. Nuclei were identified using  
506 100ng/ml DAPI (D8417, Sigma). Stained sections were imaged using the Operetta® High Content  
507 Imaging and Analysis system (PerkinElmer) and Harmony® software (PerkinElmer) for whole  
508 section images and a Leica Sp8 confocal microscope or a Leica DMI8 inverted microscope with  
509 Leica Application Suite X software for all other immunohistochemical imaging. To quantify  
510 MyRF staining, MyRF+ cells were counted along the length of the whole corpus callosum from  
511 medial sagittal sections from three animals per genotype. A one-way ANOVA with correction for  
512 multiple comparisons or a Welch's t-test was performed to determine statistical significance across  
513 genotypes.

514  
515 **qRT-PCR.** Mice were euthanized using isoflurane overdose. Different brain regions (cerebral  
516 cortex, cerebellum, and brainstem) were harvested. Each brain region was split in two and half  
517 was used for RNA quantification using qRT-PCR, the other for western blot analysis (see below).  
518 TRI Reagent (R2050-1-200, Zymo Research) was separately added to tissue and samples were  
519 homogenized using Kontes Pellet Pestle Grinders (KT749520-0000, VWR). RNA was extracted  
520 using the RNeasy Mini Kit (74104, Qiagen) according to the manufacturer's instructions. Reverse  
521 transcription was performed using the iScript cDNA Synthesis Kit (1708891, Biorad) with 1µg of  
522 RNA per reaction. Real-Time PCR was then performed on an Applied Biosystems 7300 Real-time  
523 PCR system with 10ng cDNA per sample in quadruplicate using Taqman gene expression master  
524 mix (4369016, ThermoFisher) and the following pre-designed Taqman gene expression assays  
525 (4351370, ThermoFisher): *Plp1* (Mm01297210\_m1), *Mbp* (Mm01266402\_m1) and *Actb*

526 (Mm00607939\_s1) (endogenous control). Expression values were normalized to *Actb* and to wild-  
527 type samples (for CRISPR cohort) or wild-type untreated samples (for ASO-treated wild-type  
528 cohort). Graphpad Prism software was used to perform a one-way ANOVA with Tukey correction  
529 or a one-way ANOVA with Dunnett's correction for multiple comparisons to determine statistical  
530 significance across genotypes or ASO treatments, respectively.

531

**Protein quantification and western blot.** Tissues were obtained as described above. Protein lysis  
532 buffer consisting of RIPA buffer (R0278, Sigma), cOmplete™ Mini EDTA-free Protease Inhibitor  
533 Cocktail (11836170001, Sigma), Phosphatase Inhibitor Cocktail 3 (P0044, Sigma), Phosphatase  
534 Inhibitor Cocktail 2 (P5726, Sigma), and BGP-15 (B4813, Sigma) was added to each sample.  
535 Tissue was homogenized using Dounce Tissue Grinders (D8938, Sigma). Lysate was separated by  
536 centrifugation at 17000g for 15 minutes at 4°C. A BCA standard curve was generated using the  
537 Pierce BCA Protein Assay Kit (23225, Thermo Scientific) and used to samples to an equivalent  
538 protein concentration. Equal amounts of sample were run on a NuPAGE 4-12% Bis-Tris Protein  
539 gel (NP0335BOX or NP0329BOX, Thermo Fisher), then electrophoretically transferred to a  
540 PVDF membrane (LC2002, Invitrogen or 926-31097, Li-Cor). The membrane was blocked with  
541 5% milk in TBS-T for an hour, then hybridized with mouse anti-MBP antibody (1µg/mL; 808401,  
542 Biologend) or rat anti-PLP antibody (1:1000; Lerner Research Institute Hybridoma Core,  
543 Cleveland, OH) overnight at 4°C. Blots were then washed in TBS-T and incubated in goat anti-  
544 mouse HRP (1:2500, 7076, Cell Signaling), goat anti-rat HRP (1:2500, 7077, Cell Signaling), or  
545 IRDye secondaries (1:20000, 925, Li-Cor). Each sample was normalized to B-actin using HRP-  
546 conjugated mouse anti-B-actin (1:10000, A3854-200UL, Sigma-Aldrich). All secondary  
547 antibodies were incubated for one hour at room temperature. Blots were analyzed with the  
548

549 Odyssey® Fc imaging system (Li-Cor). Graphpad Prism software was used to perform a one-way  
550 ANOVA with Tukey correction or a one-way ANOVA with Dunnett's correction for multiple  
551 comparisons to determine statistical significance across genotypes or ASO treatments,  
552 respectively. Raw annotated images of full western blots are provided in Supplementary Figs. 2  
553 and 4.

554  
**Electron microscopy and toluidine blue staining.** Mice were anesthetized with isoflurane and  
555 rapidly euthanized. Tissue was collected after transcardial perfusion with PBS followed by 4%  
556 paraformaldehyde and 2% glutaraldehyde (16216, Electron Microscopy Sciences) in 0.1M sodium  
557 cacodylate buffer, pH 7.4 (11652, Electron Microscopy Sciences), except for 6 month optic nerve  
558 samples which were placed directly into fixative without perfusion. Samples were post-fixed with  
559 1% osmium tetroxide (19150, Electron Microscopy Sciences) and stained with 0.25% uranyl  
560 acetate (22400, Electron Microscopy Sciences), en bloc. Samples were dehydrated using  
561 increasing concentrations of ethanol, passed through propylene oxide, and embedded in Eponate  
562 12™ epoxy resin (18012, Ted Pella). Silver-colored sections were prepared (Leica EM UC6),  
563 placed on 300 mesh nickel grids (T300-Ni, Electron Microscopy Sciences), stained with 2% uranyl  
564 acetate in 50 % methanol, and stained with lead citrate (17800, Electron Microscopy Sciences).  
565 Sections were imaged using a FEI Tecnai Spirit electron microscope at 80 kV. Myelinated axons  
566 were manually counted from the sections made on the middle part of the nerve lengthwise and at  
567 least three areas across the optic nerve diameter using Adobe Photoshop (Adobe Systems).  
568 Graphpad Prism software was used to perform a one-way ANOVA with Tukey correction to  
569 determine significance across genotypes. Toluidine Blue (22050, Electron Microscopy Sciences)  
570 stained 1µm sections were prepared from same epoxy resin embedded samples above and  
571

572 visualized with a light microscope (Zeiss Axioskop2) using plan-NEOFLUAR 100X 1.30 oil  
573 objective lens and images were captured using a Scion 1394 color camera with ImageJ software.

574  
575 **Optic nerve electrophysiology.** Mice were deeply anesthetized with isoflurane and euthanized.

576 Each eye with its attached optic nerve was dissected and placed in Ringer's solution consisting of

577 129mM NaCl (BP358-212, Fisher Scientific), 3mM KCl (BP366-500, Fisher Scientific), 1.2mM

578 NaH<sub>2</sub>PO<sub>4</sub> (1-3818, J. T. Baker Chemical), 2.4mM CaCl<sub>2</sub> (C79-500, Fisher Scientific), 1.3mM

579 MgSO<sub>4</sub> (M2643, Sigma), 20mM NaHCO<sub>3</sub> (S233-500, Fisher Scientific), 3mM HEPES (H3375,

580 Sigma), 10mM glucose (G5767, Sigma), oxygenated using a 95%O<sub>2</sub>/5% CO<sub>2</sub> gas mixture. Each

581 nerve was carefully cleaned, transected behind the eye, at the optic chiasm, and allowed to recover

582 for one hour in oxygenated Ringer's solution at room temperature (22–24°C). Each end of the

583 nerve was set in suction electrodes, pulled from polyethylene tubing (PE-190, BD Biosciences).

584 Monophasic electrical stimuli were applied to the proximal end of the nerve and recordings were

585 captured at the distal end. The recovery of the response was monitored every 20 min for one hour,

586 and only fully recovered samples were subjected to additional stimuli. Stimuli were generated with

587 a S48 stimulator (Grass Technologies) and isolated from ground with PSIU6B unit (Grass

588 Technologies). Supra-threshold stimulus was determined using 30μs stimulus duration. The

589 response was amplified 100X with P15D preamplifier (Grass Technologies), monitored with

590 oscilloscope (V1585, Hitachi), digitized with Digidata1550A (Axon Instruments) and recorded

591 using 50kHz sampling rate with AxoScope software (Axon Instruments). The distance between

592 the electrodes was measured and used to calculate the conduction velocity of the compound action

593 potential (CAP) peaks at their latency. Recorded signals were analyzed using AxoScope software.

594

595 **Open Field Testing.** Locomotion was assessed by open field testing. Animals were placed in the  
596 center of a 20-inch by 20-inch square box and all movements were captured for a total of five  
597 minutes using ANY-maze software version 5.0 (Stoelting Co). Total distance traveled was  
598 reported for each animal. Graphpad Prism software was used to perform a one-way ANOVA with  
599 Tukey correction or a one-way ANOVA with Dunnett's correction for multiple comparisons to  
600 determine statistical significance across genotypes or ASO treatments, respectively.

601  
602 **Rotarod Testing.** Motor performance was assessed using a Rota Rod Rotomax 5 (Columbus  
603 Instruments) with a 3cm diameter rotating rod. Immediately prior to testing animals were trained  
604 at a constant speed of 4 rounds per minute (rpm) for a total of two minutes. Testing began at 4 rpm  
605 with an acceleration of 0.1 rpm/s. Time to fall was recorded from three independent trials, and the  
606 average value for each animal was reported. Between training and each experimental trial animals  
607 were allowed to rest for at least five minutes. Graphpad Prism software was used to perform a one-  
608 way ANOVA with Tukey correction or a one-way ANOVA with Dunnett's correction for multiple  
609 comparisons to determine statistical significance across genotypes or ASO treatments,  
610 respectively.

611  
612 **Generation of iPSCs.** Tail tips (2 mm piece from 8 day old CR-*impy* mice) were bisected, placed  
613 on Nunclon-Δ 12-well plates (150628, ThermoFisher), and covered with a circular glass coverslip  
614 (12-545-102; Fisher Scientific) to maintain tissue contact with the plate and enable fibroblast  
615 outgrowth. Tail-tip fibroblasts were cultured in 'fibroblast medium' consisting of DMEM  
616 (11960069, ThermoFisher) with 10% fetal bovine serum (FBS; 16000044, ThermoFisher), 1x non-  
617 essential amino acids (11140050, ThermoFisher), 1x Glutamax (35050061, ThermoFisher), and

618 0.1 mM 2-mercaptoethanol (M3148, Sigma Aldrich) supplemented with 100U/mL penicillin-  
619 streptomycin (15070-063, ThermoFisher). Medium was changed every day for the first 3 days and  
620 then every other day.

621  
622 Fibroblasts were seeded at approximately  $1.4 \times 10^4$  cells/cm<sup>2</sup> on Nunclon-Δ dishes in fibroblast  
623 medium, and allowed to equilibrate overnight. The following day medium was removed and  
624 replaced with an equal volume of pHAGE2-TetOminiCMV-STEMCCA-W-loxp lentivirus  
625 encoding a floxed, doxycycline-inducible polycistronic Oct4, Sox2, Klf4, and c-Myc construct and  
626 pLVX-Tet-On-Puro (632162, Clontech) lentivirus supplemented with 8μg/mL polybrene (107689,  
627 Sigma). Lentivirus was prepared using the Lenti-X Packaging Single Shots (631275, Clontech)  
628 according to manufacturer's instructions. Three hours later lentivirus medium was removed and  
629 replaced with fibroblast medium supplemented with 2 μg/ml doxycycline (631311, Clontech). The  
630 following day media was removed and replaced with an equal volume of pHAGE2-  
631 TetOminiCMV-STEMCCA-Wloxp and pLVX-Tet-On-Puro lentivirus supplemented with  
632 8μg/mL polybrene. Three hours later lentivirus media was diluted 1:2 with fibroblast medium.  
633 Medium was changed each day with fibroblast medium supplemented with 2 μg/ml doxycycline  
634 and 10<sup>3</sup> units/ml LIF. After 3 days fibroblasts were lifted using Accutase and seeded on Nunclon-  
635 Δ plates, atop a feeder layer of irradiated mouse embryonic fibroblasts (iMEFs; produced in-house)  
636 previously plated at  $1.7 \times 10^4$  cells/cm<sup>2</sup> on 0.1% gelatin (1890, Sigma) coated Nunclon-Δ plates in  
637 “pluripotency medium” consisting of Knockout DMEM (10829-018, ThermoFisher), 5% FBS,  
638 15% knockout replacement serum (10828028, ThermoFisher), 1x Glutamax, 1x nonessential  
639 amino acids, 0.1 mM 2-mercaptoethanol, and 10<sup>3</sup> units/ml LIF (LIF; ESG1107, EMD Millipore)  
640 supplemented with 2 μg/ml doxycycline. Medium was changed every day until iPSC colonies



641 began to emerge. Individual colonies were picked and dissociated in accutase and were  
642 individually plated in single wells of Nunclon-Δ 12-well plates, atop an iMEF feeder layer in  
643 pluripotency medium supplemented with 2 μg/ml doxycycline. Clones were further expanded,  
644 with daily medium changes. iPSC colonies were stained for pluripotency markers and karyotyped  
645 at the seventh passage after derivation (Cell Line Genetics; Madison, WI). CR-*impy* iPSCs were  
646 derived and characterized for this study (line identifier jpCR100.1). Isogenic comparator *jimpy*  
647 (line identifier i.jp-1.6) and wild-type (line identifier i.wt-1.0) iPSC lines were described and  
648 characterized separately<sup>22</sup>. Genotypes of iPSCs were re-verified prior to use.

649  
650 **Generation of iPSC-derived OPCs.** iPSCs were differentiated to OPCs as previously described  
651 <sup>25,26</sup>. In brief, iPSC were isolated from their iMEF feeder layer using 1.5mg/mL collagenase type  
652 IV (17104019, ThermoFisher) and dissociated with either 0.25% Trypsin-EDTA or Accutase and  
653 seeded at  $7.8 \times 10^4$  cells/cm<sup>2</sup> on Costar Ultra-Low attachment 6-well plates (3471, Corning).  
654 Cultures were then directed through a stepwise differentiation process to generate pure populations  
655 of OPCs. OPCs were maintained in “OPC medium” consisting of DMEM/F12 (11320082,  
656 ThermoFisher), 1x N2 supplement (AR009, R&D Systems), 1x B-27 without vitamin A  
657 supplement (12587-010, ThermoFisher), and 1x Glutamax (collectively “N2B27 medium”),  
658 supplemented with 20 ng/mL fibroblast growth factor 2 (FGF2; 233-FB, R&D Systems) and 20  
659 ng/mL platelet-derived growth factor-AA (PDGF-AA; 221-AA, R&D Systems). Medium was  
660 changed every other day. For characterization of purity, iPSC-derived OPCs from all genotypes  
661 were fixed with 4% PFA and immunostained for canonical OPC transcription factors, Olig2 and  
662 Sox10.

664 ***In vitro* assessment of oligodendrocyte differentiation and survival from OPCs.** OPCs from  
665 each genotype were plated in parallel onto Nunclon- $\Delta$  96-well plates (150628, ThermoFisher) that  
666 were first coated with 100  $\mu$ g/mL poly(L-ornithine) (P3655, Sigma), followed by 10  $\mu$ g/ml laminin  
667 solution (L2020, Sigma). For the oligodendrocyte differentiation assay, 25,000 cells were seeded  
668 per well in media that consisted of DMEM/F12 (11320082, ThermoFisher), 1x N2 supplement  
669 (AR009, R&D Systems), 1x B-27 without vitamin A supplement (12587-010, ThermoFisher), and  
670 1x Glutamax, supplemented with T3 (40ng/ml), Noggin (100ng/ml), cAMP (10uM), IGF  
671 (100ng/ml) and NT3 (10ng/ml). All plates were incubated at 37°C and 5% CO<sub>2</sub> for 3 days. Cells  
672 were immunostained using for myelin protein markers. Eight fields were captured per well and the  
673 total number of MBP<sup>+</sup> cells were quantified for each cell line. Graphpad Prism software was used  
674 to perform a one-way ANOVA with Tukey correction for multiple comparisons to determine  
675 statistical significance across genotypes.

676  
677 **Immunocytochemistry.** Cells were fixed with 4% paraformaldehyde (PFA) in phosphate buffered  
678 saline (PBS). After fixation, cells were permeabilized with 0.2% Triton X-100 in PBS followed  
679 by blocking in 10% donkey serum in PBS. Cells were stained overnight at 4°C with the following  
680 primary antibodies diluted in blocking solution: rat anti-MBP (1:100; ab7349, Abcam), rat anti-  
681 PLP (1:5000; Lerner Research Institute Hybridoma Core, Cleveland, OH), goat anti-Sox10  
682 (2 $\mu$ g/mL; AF2864, R&D Systems), rabbit anti-Olig2 (1:1000; 13999-1-AP, ProteinTech), rabbit  
683 anti-Nanog (0.4 $\mu$ g/mL; AB21624, Abcam), mouse anti-Oct4 (0.4 $\mu$ g/mL; SC-5279, Santa Cruz).  
684 For secondary immunostaining, Alexa Fluor® antibodies (ThermoFisher) were used at 1 $\mu$ g/ml,  
685 and DAPI (100ng/mL, D8417, Sigma) was used at to identify nuclei.

686

687 **ASO design and characterization.** Second generation ASOs were designed to target mouse *Plp1*.  
688 ASOs consisted of 20-mer nucleotide sequences with 2'-O-methoxyethyl (MOE) modifications  
689 and a mixed backbone of phosphorothioate and phosphodiester internucleotide linkages.

690  
691 ASOs were screened for efficacy in primary E16 cortical cultures, as previously described <sup>35</sup>.  
692 Briefly, cells were treated with ASOs at 37°C/5% CO<sub>2</sub> for 3 days, RNA was isolated, and *Plp1*  
693 transcript level was quantified with qRT-PCR on Step One instruments (Thermo Fisher). *Plp1*  
694 mRNA was normalized to total RNA measured with the Quant-iT™ RiboGreen® RNA reagent.  
695 ASOs that efficiently reduced *Plp1* mRNA were selected for *in vivo* screening and tolerability  
696 studies.

697  
698 Lead ASOs were administered to 8 week old C57BL/6J mice (Jackson Labs) via single 500 µg  
699 intracerebroventricular (ICV) injection and *Plp1* mRNA levels were measured by RT-qPCR in  
700 cortex and spinal cord tissue after 2 weeks. ASOs with greater than 90% *Plp1* mRNA reduction  
701 were selected for further characterization. These were administered to mice via single 300 µg ICV  
702 bolus injection to test for efficacy and tolerability, as measured by markers of glial cell activation,  
703 8 weeks post-ICV. Levels of *Plp1* mRNA as well as markers of astro- or micro-glial activation,  
704 *Gfap*, *Aif1*, and *CD68*, were assessed by RT-qPCR using the following custom primer/probe sets  
705 (Integrated DNA Technologies):

| Gene        | Forward primer         | Reverse primer           | Probe (5'FAM; 3'TAMRA)     |
|-------------|------------------------|--------------------------|----------------------------|
| <i>Plp1</i> | CTGATGCCAGAATGTATGGTGT | AGGTGGAAGGTCATTTGGAAC    | TGCAGATGGACAGAAGGTTGGAGC   |
| <i>Gfap</i> | GAAACCAGCCTGGACACCAA   | TCCACAGTCTTTACCACGATGTTT | TCCGTGTCAGAAGGCCACCTCAAGA  |
| <i>Aif1</i> | TGGTCCCCCAGCCAAGA      | CCCACCGTGTGACATCCA       | AGCTATCTCCGAGCTGCCCTGATTGG |
| <i>Cd68</i> | TGGCGGTGGAATACAATGTG   | GATGAATTCTGCGCCATGAA     | CCTCCCACAGGCAGCACAGTGG     |

706

707 Immunohistochemical staining was used to assess morphology of astrocytes (rabbit polyclonal  
708 antibody, DAKO) and microglia (rabbit polyclonal antibody, WAKO) in formalin-fixed, paraffin  
709 embedded brain and spinal cord sections. *Plp1* ASO.a (intron 5) and ASO.b (3' UTR) were  
710 selected for use in *jimpy* mice, as well as a control ASO with no known murine target.

711

712 **Therapeutic application of ASOs to postnatal mice.** Male pups from crosses between *jimpy*  
713 mutation carrier females and wild-type males were administered 30ug of either *Plp1*-targeting  
714 ASOs *Plp1.a*, *Plp1.b*, a control non-targeting ASO, or left untreated. ASOs were administered  
715 using a Hamilton 1700 gastight syringe (7653-01, Hamilton Company) by ICV injection to  
716 cryoanesthetized mice. The needle was placed between bregma and the eye, 2/5 the distance from  
717 bregma, and inserted to a depth of 2mm according to published protocols<sup>49</sup>. A total volume of 2uL  
718 was administered to the left ventricle. Mice were allowed to recover on a heating pad and  
719 subsequently reintroduced to the mother.

720

721 Mice were genotyped at approximately postnatal day 7 and monitored daily for onset of typical  
722 *jimpy* phenotypes including tremors, seizures, and early death by 3 weeks of age. Lifespan was  
723 determined for each animal with statistical significance among groups determined using the log-  
724 rank test. All mice surviving to a pre-determined endpoint of 8 months of age were sacrificed for  
725 histological analysis. Additionally, animals surviving beyond 3 weeks were analyzed using  
726 behavioral (rotarod and open field testing for motor performance). Details and metadata for all  
727 mice in this study are found in Supplementary Fig. 3.

728  
729

## FIGURE 1

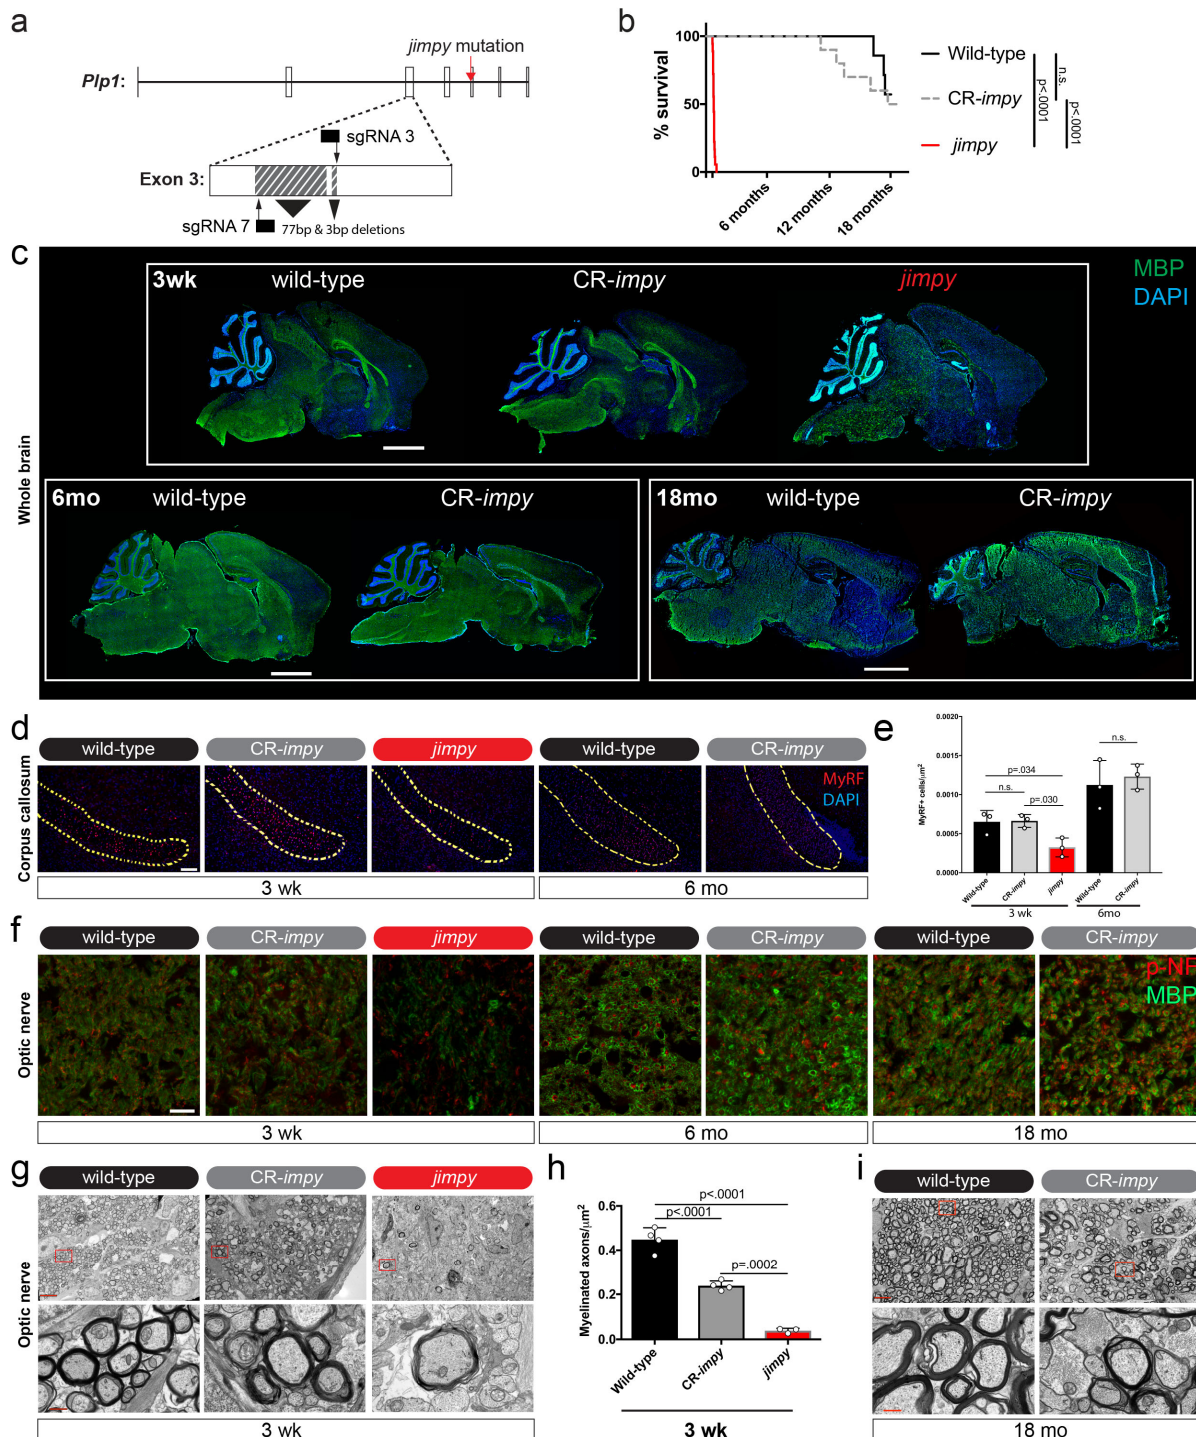

**Fig. 1 | Prevention of PMD and rescue of lifespan by CRISPR-mediated knockdown of *Plp1* in the germline of *jimpy* mice.**

**a**, Schematic of *Plp1* targeting in *jimpy* using CRISPR-spCas9. The location of the *jimpy* mutation in the 3' splice acceptor site of intron 4 is indicated by a red arrow. Two separate sgRNAs (denoted

730  
731  
732  
733  
734  
735

736 3 and 7) were utilized and their DNA binding sites are indicated by solid black bars and their  
737 predicted cutting sites by black arrows. The complex, frameshift deletion of 80 base-pairs of  
738 deleted sequence within exon 3 in the *CR-imp*y mice is shown by two grey hashed boxes (see  
739 Extended Data Fig. 1 for more detail and sequence traces).

740 **b**, Kaplan-Meier plot comparing lifespan of contemporaneous wild-type, *jimpy*, and *CR-imp*y  
741 mouse cohorts.  $n = 25, 18,$  and  $23$  starting animals in the wild-type, *jimpy*, and *CR-imp*y cohorts,  
742 respectively (see Supplementary Fig. 1 for metadata of every animal in this study including  
743 censoring of animals for molecular and functional studies at pre-determined time points). p-values  
744 calculated using the log-rank test between cohorts.

745 **c**, Representative immunohistochemical images of whole-brain sagittal sections showing MBP+  
746 oligodendrocytes (green) and total DAPI+ cells (blue) in wild-type, *CR-imp*y, and *jimpy* mice at 3  
747 weeks, 6 months, and 18 months of age. Scale bar, 2mm.

748 **d**, Representative sagittal immunohistochemical images of the rostral end of the corpus callosum  
749 showing MyRF+ oligodendrocytes (red) and total DAPI+ cells (blue) in wild-type, *CR-imp*y, and  
750 *jimpy* mice at 3 weeks, 6 months, and 18 months of age. Scale bar, 100 $\mu$ m.

751 **e**, Quantification of MyRF+ oligodendrocytes in the corpus callosum at 3 weeks and 6 months of  
752 age for each genotype.  $n=3$  mice per genotype at each time point. Error bars show mean  $\pm$  standard  
753 deviation. p-values calculated using ANOVA with Tukey correction for multiple comparisons at  
754 3 weeks and Welch's t-test at 6 months.

755 **f**, Representative confocal immunohistochemical images of optic nerve cross sections showing  
756 MBP+ oligodendrocytes (green) and phospho-neurofilament+ intact axons (red) in wild-type, *CR-*  
757 *imp*y, and *jimpy* mice at 3 weeks, 6 months, and 18 months of age. Scale bar, 20 $\mu$ m.

758 **g**, Representative electron micrograph images showing myelination in optic nerve cross sections  
759 in wild-type, *CR-imp*y, and *jimpy* mice at 3 weeks of age. Lower panel is a higher magnification  
760 of red boxed area in the upper panel. Upper panel scale bar, 5 $\mu$ m and lower panel scale bar is  
761 0.5 $\mu$ m.

762 **h**, Quantification of the number of myelinated axons in optic nerves of each genotype at postnatal  
763 week 3.  $n=4$  mice for wild-type and *CR-imp*y and  $n=3$  mice for and *jimpy* genotypes. Error bars  
764 show mean  $\pm$  standard deviation. p-values calculated using ANOVA with Tukey correction for  
765 multiple comparisons.

766 **i**, Representative electron micrograph images of myelination in optic nerve cross sections in wild-  
767 type and *CR-imp*y mice at 18 months of age. Lower panel is a higher magnification of red boxed  
768 area in the upper panel. Upper panel scale bar, 5 $\mu$ m and lower panel scale bar is 0.5 $\mu$ m.

769  
770

FIGURE 2

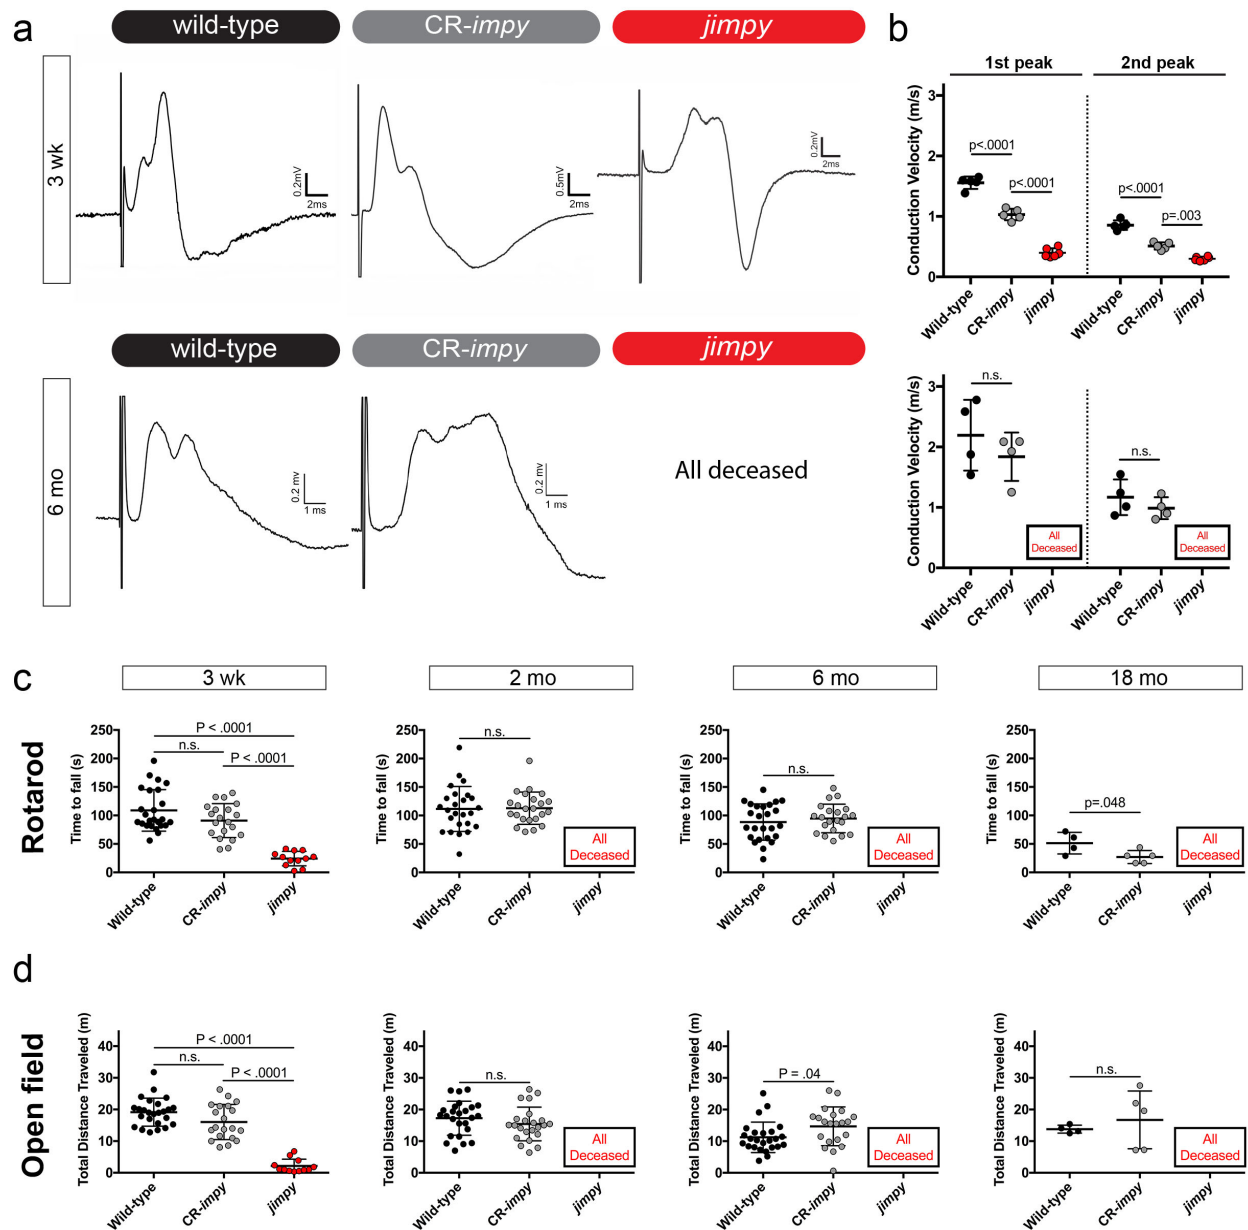

**Fig. 2 | CRISPR-mediated knockdown of *Plp1* in *jimpy* mice restores myelin function and motor phenotypes.**

**a**, Representative electrophysiology optic nerve conduction traces from wild-type, CR-impy, jimpy mice at 3 weeks and 6 months of age.

**b**, Quantification of optic nerve conduction velocities from wild-type, CR-impy, jimpy mice at 3 weeks and 6 months of age. Each point represents an individual biological replicate (optic nerves from separate mice) with n = 5, 5, and 6 wild-type, jimpy, and CR-impy mice, respectively, at the 3 week time point and n = 4 wild-type and CR-impy mice each at the 6 month time point. Error bars show mean ± standard deviation. p-values calculated using one-way ANOVA with Tukey

771  
772  
773  
774  
775  
776  
777  
778  
779  
780  
781

782 correction for multiple comparisons at 3 weeks and two-way, unpaired t-test at 6 months.  
783 **c**, Comparison of motor function and coordination of wild-type, CR-*impy*, and *jimpy* mice at 3  
784 weeks (n=25, 20, and 12 wild-type, *jimpy*, and CR-*impy* mice), 2 months (n= 25 and 23 wild-type  
785 and CR-*impy* mice), 6 months (n=25 and 21 wild-type and CR-*impy* mice), and 18 months of age  
786 (n=4 and 5 wild-type and CR-*impy* mice) by accelerating rotarod performance. Individual data  
787 points represent the mean time to fall of three separate trials for each biological replicate (separate  
788 mice). Error bars show mean  $\pm$  standard deviation. p-values calculated using one-way ANOVA  
789 with Tukey correction for multiple comparisons at 3 weeks or two-way, unpaired t-test at later  
790 time points. See Supplementary Fig. 1 for raw data values.

791 **d**, Comparison of locomotor activity of wild-type, CR-*impy*, and *jimpy* mice at 3 weeks (n=25, 20,  
792 and 12 wild-type, *jimpy*, and CR-*impy* mice), 2 months (n= 25 and 23 wild-type and CR-*impy*  
793 mice), 6 months (n=25 and 21 wild-type and CR-*impy* mice), and 18 months of age (n=4 and 5  
794 wild-type and CR-*impy* mice) by open field testing. Individual data points represent total distance  
795 traveled for each biological replicate (separate mice). Error bars show mean  $\pm$  standard deviation.  
796 p-values calculated using one-way ANOVA with Tukey correction for multiple comparisons at 3  
797 weeks or two-way, unpaired t-test at later time points. See Supplementary Fig. 1 for raw data  
798 values.



799  
800

### FIGURE 3

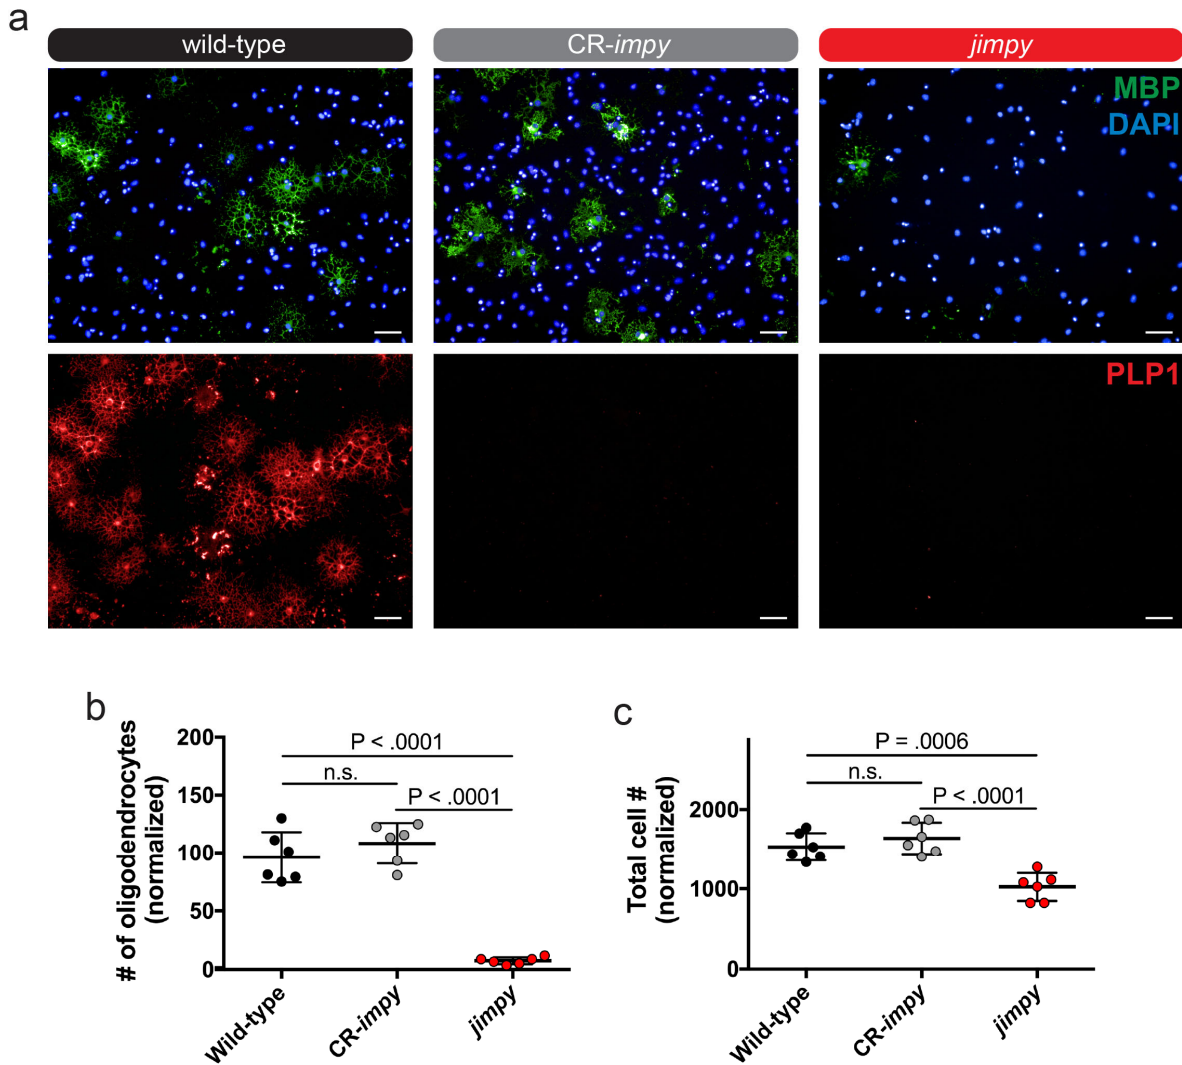

801  
802  
803  
804  
805  
806  
807  
808  
809  
810  
811  
812  
813  
814  
815

### Fig. 3 | CRISPR-mediated knockdown of *Plp1* in *jimpy* OPCs rescues survival of differentiating oligodendrocytes *in vitro*.

**a**, Representative immunocytochemistry images of MBP+ oligodendrocytes and PLP+ oligodendrocytes from wild-type, CR-imp1y, and *jimpy* iPSC-derived OPCs differentiated *in vitro* for 3 days. Top and bottom rows are the same field but channels are separated for clarity. Note the PLP1 antibody detects a C-terminal peptide sequence not present in *jimpy* and therefore absence of staining simply serves as validation of *jimpy* genotype but not quantification of total PLP1 protein (for which there are no validated N-terminal antibodies for immunostaining). Scale bar, 50 μm.

**b-c**, Quantification of MBP+ oligodendrocytes (b) and total DAPI+ cells (c). Error bars show mean ± standard deviation. n=6 technical replicates (single cell line per genotype with 6 separate wells scored). p-values calculated using one-way ANOVA with Tukey correction for multiple comparisons.



825 **b**, Schematic of the experimental design for ASO experiments. A single 30ug dose of ASO was  
826 administered by intracerebroventricular injection into the lateral ventricle within one day after  
827 birth. Functional assessment was performed at 2, 4, and 6 months of age and the experiment was  
828 terminated for histological analyses at 8 months of age.

829 **c**, Kaplan-Meier plot depicting the survival of *jimpy* mice treated with two independent *Plp1*-  
830 targeting ASOs compared to controls. Groups included: untreated wild-type (n=5), wild-type  
831 treated with ASO-control (n=12), untreated *jimpy* (n=14), *jimpy* treated with ASO-control (n=5),  
832 *jimpy* treated with ASO-*Plp1.a* (n=5), and *jimpy* treated with ASO-*Plp1.b* (n=8). See  
833 Supplementary Fig. 3 for metadata of every animal in this study including behavioral studies at  
834 pre-determined time points. p-values calculated using the log-rank test.

835 **d-e**, Representative immunohistochemical images of 3 week (d) and 8 month (e) whole-brain  
836 sagittal sections showing MBP+ oligodendrocytes (green) and total DAPI+ cells (blue) in control  
837 and *jimpy* mice treated with indicated ASOs. Scale bar, 2mm.

838 **f**, Representative sagittal images of the 3 week old rostral corpus callosum showing MyRF+  
839 oligodendrocytes in control and *jimpy* mice treated with indicated ASOs. Scale bar, 100um.

840 **g**, Representative toluidine blue stained images showing myelinated axons in the corpus callosum  
841 of 8 month old wild-type and *jimpy* mice treated with the indicated ASOs. Scale bar, 20um.

842 **h**, Representative electron micrograph images showing myelination in the corpus callosum of 8  
843 month old wild-type and *jimpy* animals treated with the indicated ASOs. Lower panel is a higher  
844 magnification of red boxed area in the corresponding image in the upper panel. Upper panel scale  
845 bar, 5um and lower panel scale bar is 0.5um.

846 **i**, Comparison of motor function and coordination of 2 month (n=5, 5, and 8 for untreated wild-  
847 type, ASO-*Plp1.a*-treated *jimpy*, and ASO-*Plp1.b*-treated *jimpy* mice), 4 month (n=5, 5, and 7 for  
848 untreated wild-type, ASO-*Plp1.a*-treated *jimpy*, and ASO-*Plp1.b*-treated *jimpy* mice), and 6 month  
849 (n=5, 5, and 7 for untreated wild-type, ASO-*Plp1.a*-treated *jimpy*, and ASO-*Plp1.b*-treated *jimpy*  
850 mice) old mice by accelerating rotarod performance. Individual data points represent the mean  
851 time to fall of three separate trials for each biological replicate (separate mice). Error bars show  
852 mean  $\pm$  standard deviation. p-values calculated using one-way ANOVA with Dunnett's correction  
853 for multiple comparisons. See Supplementary Fig. 3 for raw data values.

854 **j**, Comparison of locomotor activity of 2 month (n=5, 5, and 8 for untreated wild-type, ASO-  
855 *Plp1.a*-treated *jimpy*, and ASO-*Plp1.b*-treated *jimpy* mice), 4 month (n=5, 5, and 7 for untreated  
856 wild-type, ASO-*Plp1.a*-treated *jimpy*, and ASO-*Plp1.b*-treated *jimpy* mice), and 6 month (n=5, 5,  
857 and 7 for untreated wild-type, ASO-*Plp1.a*-treated *jimpy*, and ASO-*Plp1.b*-treated *jimpy* mice) old  
858 mice by open field testing. Individual data points represent total distance traveled for each  
859 biological replicate (separate mice). Error bars show mean  $\pm$  standard deviation. p-values  
860 calculated using one-way ANOVA with Dunnett's correction for multiple comparisons. See  
861 Supplementary Fig. 3 for raw data values.

862  
863

## EXTENDED DATA FIGURE 1

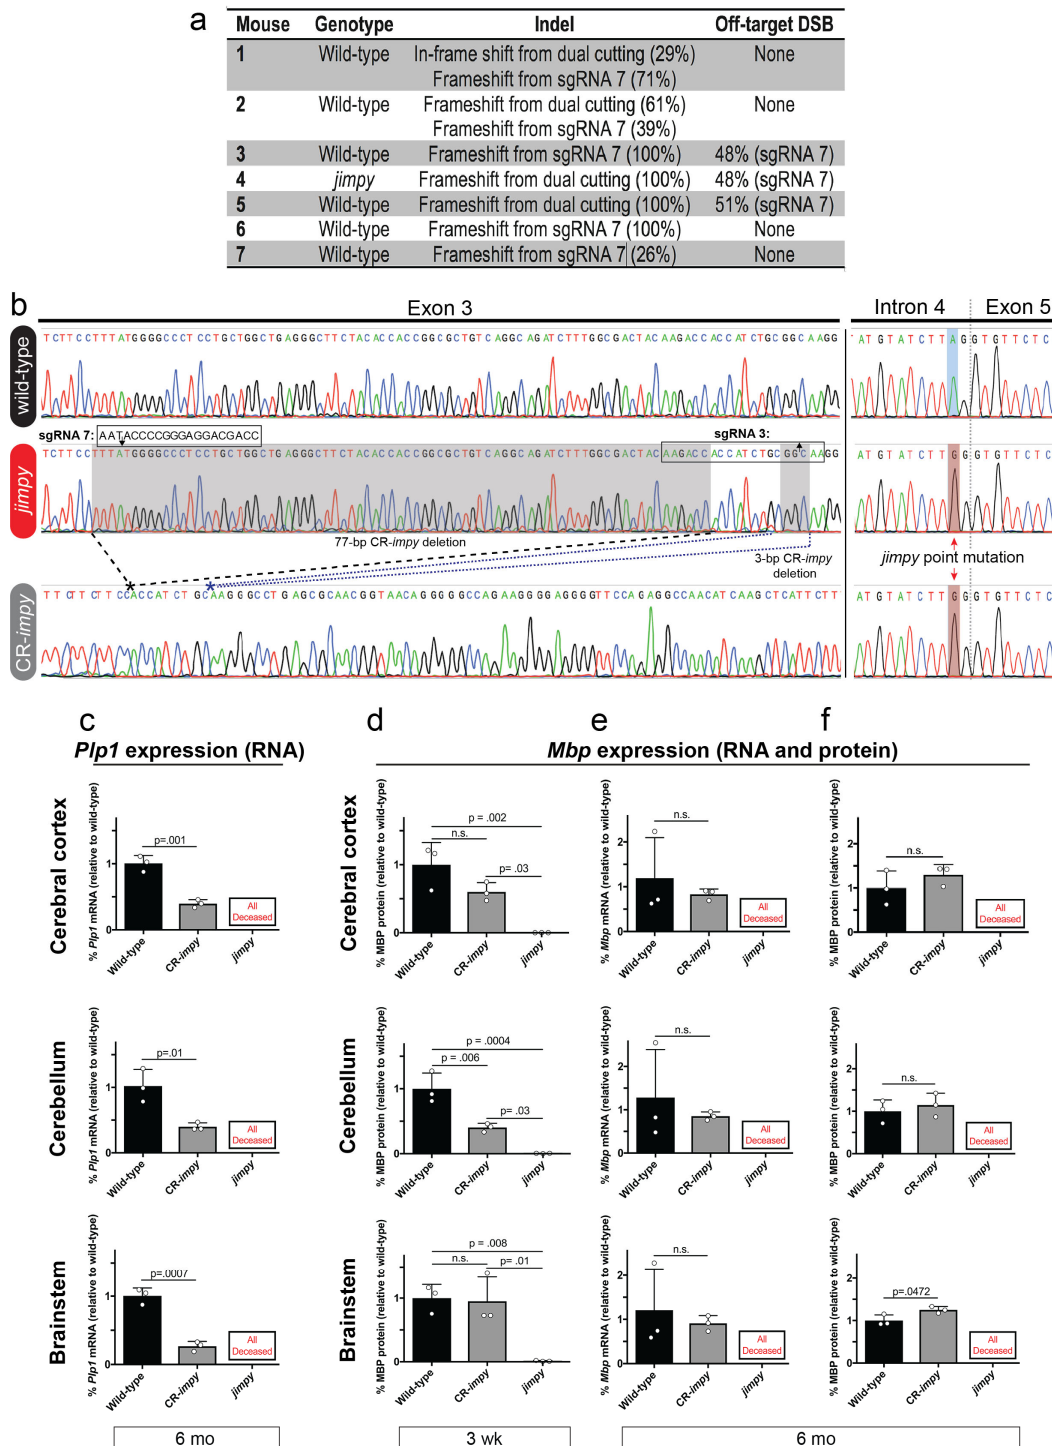

864  
865  
866  
867  
868  
869

### Extended Data Fig. 1 | CRISPR-mediated knockdown of *Pip1* in *jimpy* mice increases MBP transcript and protein levels.

**a**, Table showing the on- and off-target mutations for sgRNAs 3 and 7 after electroporation into mouse zygotes and measured by high-throughput sequencing of tail tip DNA from founder

870 animals. Mouse number 4, a *jimpy* male with a complex, frameshift deletion including 80-bp of  
871 total deleted sequence in *Plp1* exon 3, served as the founder for the CR-*impy* cohort.

872 **b**, Annotated Sanger sequencing traces of wild-type, *jimpy*, and CR-*impy* mice showing the  
873 complex, frameshift in *Plp1* exon 3 from dual cutting of CRISPR/spCas9 sgRNAs in CR-*impy*  
874 mice as well as the *jimpy* point mutation in intron 4. sgRNA 3 and 7 sequences outlined by black  
875 boxes with the predicted double strand break site shown a black arrow.

876 **c**, RT-qPCR data comparing the level of *Plp1* transcript in 6 month old CR-*impy* mice relative to  
877 wild-type mice in three different brain regions (cerebral cortex, cerebellum, and brainstem). Primer  
878 sites span *Plp1* exons 2-3, upstream of CR-*impy* complex, frameshift deletion and *jimpy* mutation  
879 sites. Individual data points represent the mean value of 4 technical replicates for each biological  
880 replicate (n=3 separate mice). Error bars show mean  $\pm$  standard deviation. p-values calculated  
881 using a two-way, unpaired t-test.

882 **d**, Western blot data comparing the level MBP in 3 week old CR-*impy* and *jimpy* mice relative to  
883 wild-type mice across three different brain regions (cerebral cortex, cerebellum, and brainstem).  
884 n=3 biological replicates (separate mice) per genotype (see Supplementary Fig. 2 for full western  
885 blot images for all samples). Error bars show mean  $\pm$  standard deviation. p-values calculated using  
886 a one-way ANOVA with Tukey correction for multiple comparisons.

887 **e**, RT-qPCR data comparing the level of *Mbp* transcript in 6 month old CR-*impy* mice relative to  
888 wild-type mice in three different brain regions (cerebral cortex, cerebellum, and brainstem).  
889 Individual data points represent the mean value of 4 technical replicates for each biological  
890 replicate (n=3 separate mice). Error bars show mean  $\pm$  standard deviation. p-values calculated  
891 using a two-way, unpaired t-test.

892 **f**, Western blot data comparing the level MBP in 6 month old CR-*impy* mice relative to wild-type  
893 mice in three different brain regions (cerebral cortex, cerebellum, and brainstem). n=3 biological  
894 replicates (separate mice) per genotype (see Supplementary Fig. 2 for full western blot images for  
895 all samples). Error bars show mean  $\pm$  standard deviation. p-values calculated using a two-way,  
896 unpaired t-test.

897  
898

## EXTENDED DATA FIGURE 2

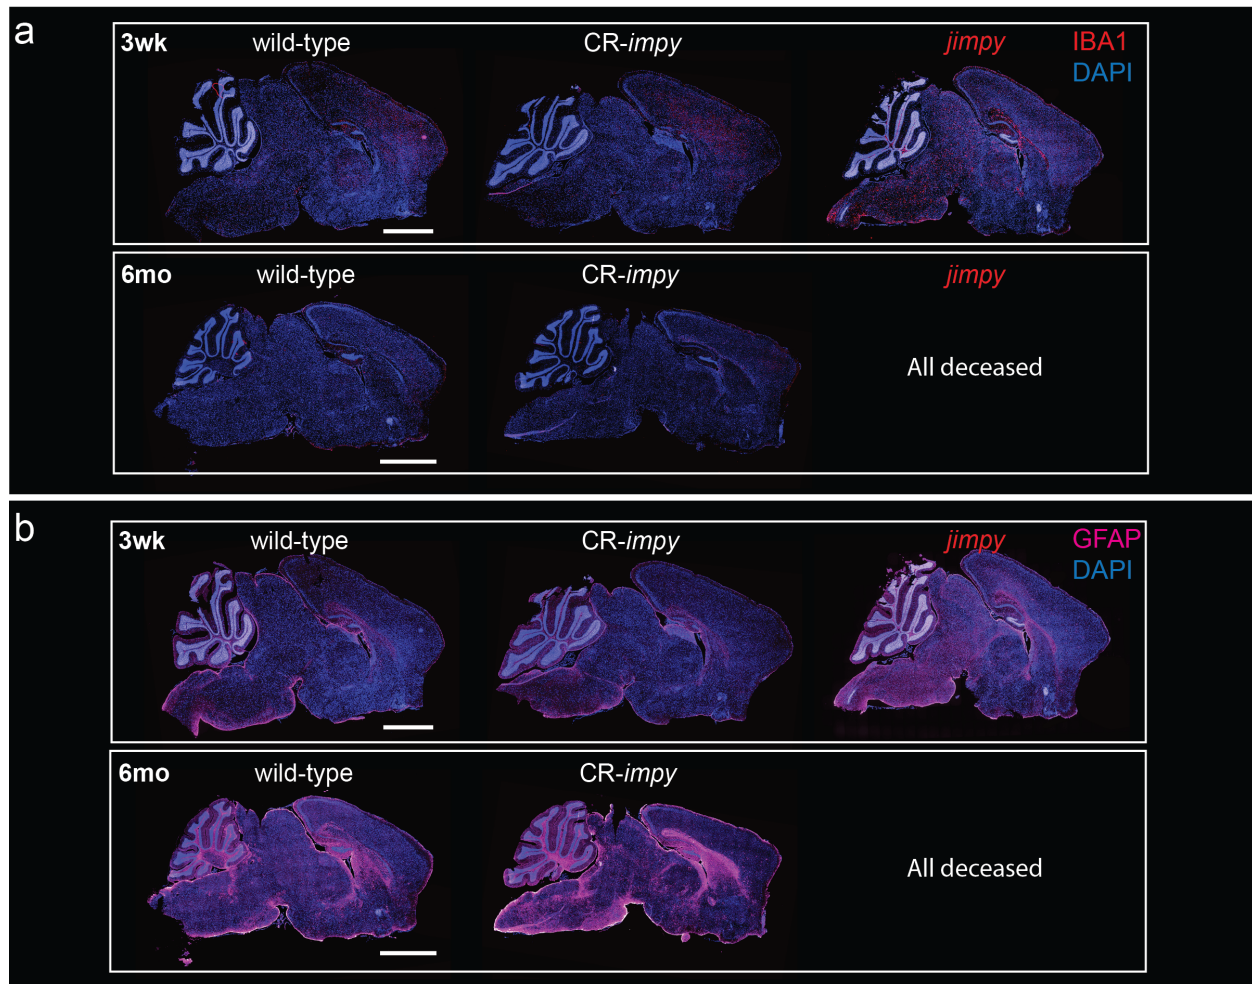

899  
900  
901  
902  
903  
904  
905  
906  
907  
908

### Extended Data Fig. 2 | CRISPR-mediated knockdown of *Plp1* in *jimpy* mice reduces activated microglia and astrocyte markers.

**a**, Representative immunohistochemical images of whole-brain sagittal sections showing IBA1+ activated microglia (red), and total DAPI+ cells (blue) in wild-type, CR-*impy*, and *jimpy* mice at 3 weeks and 6 months of age as indicated. Scale bar, 2mm.

**b**, Representative immunohistochemical images of whole-brain sagittal sections showing GFAP+ astrocytes (magenta), and total DAPI+ cells (blue) in wild-type, CR-*impy*, and *jimpy* mice at 3 weeks and 6 months of age as indicated. Scale bar, 2mm.

909  
910

### EXTENDED DATA FIGURE 3

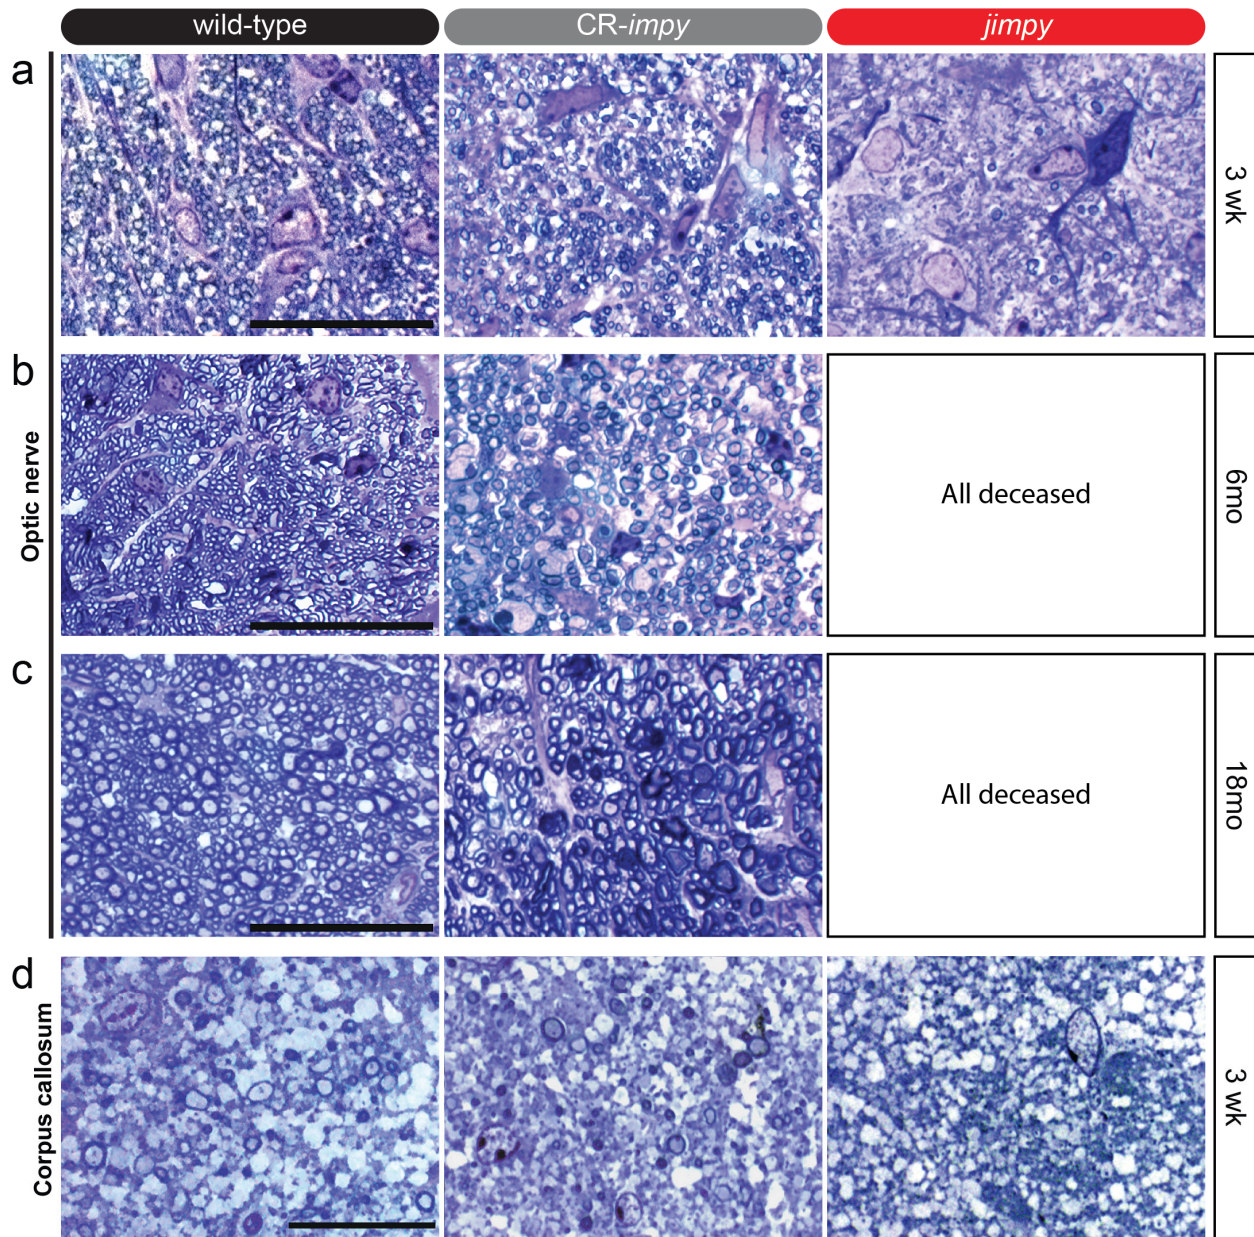

911  
912  
913  
914  
915  
916  
917  
918  
919  
920

#### Extended Data Fig. 3 | CRISPR-mediated knockdown of *Plp1* in *jimpy* mice increases myelination.

**a**, Representative images of toluidine blue-stained optic nerve sections from 3 week old wild-type, CR-*impy*, and *jimpy* mice. Scale bar, 20 $\mu$ m.

**b-c**, Representative images of toluidine blue-stained optic nerve sections from 6 month (b) and 18 month (c) old wild-type, CR-*impy*, and *jimpy* mice. Scale bar, 20 $\mu$ m.

**d**, Representative images of toluidine blue-stained corpus callosum sections from 3 week old wild-type, CR-*impy*, and *jimpy* mice. Scale bar, 20 $\mu$ m.

921  
922

## EXTENDED DATA FIGURE 4

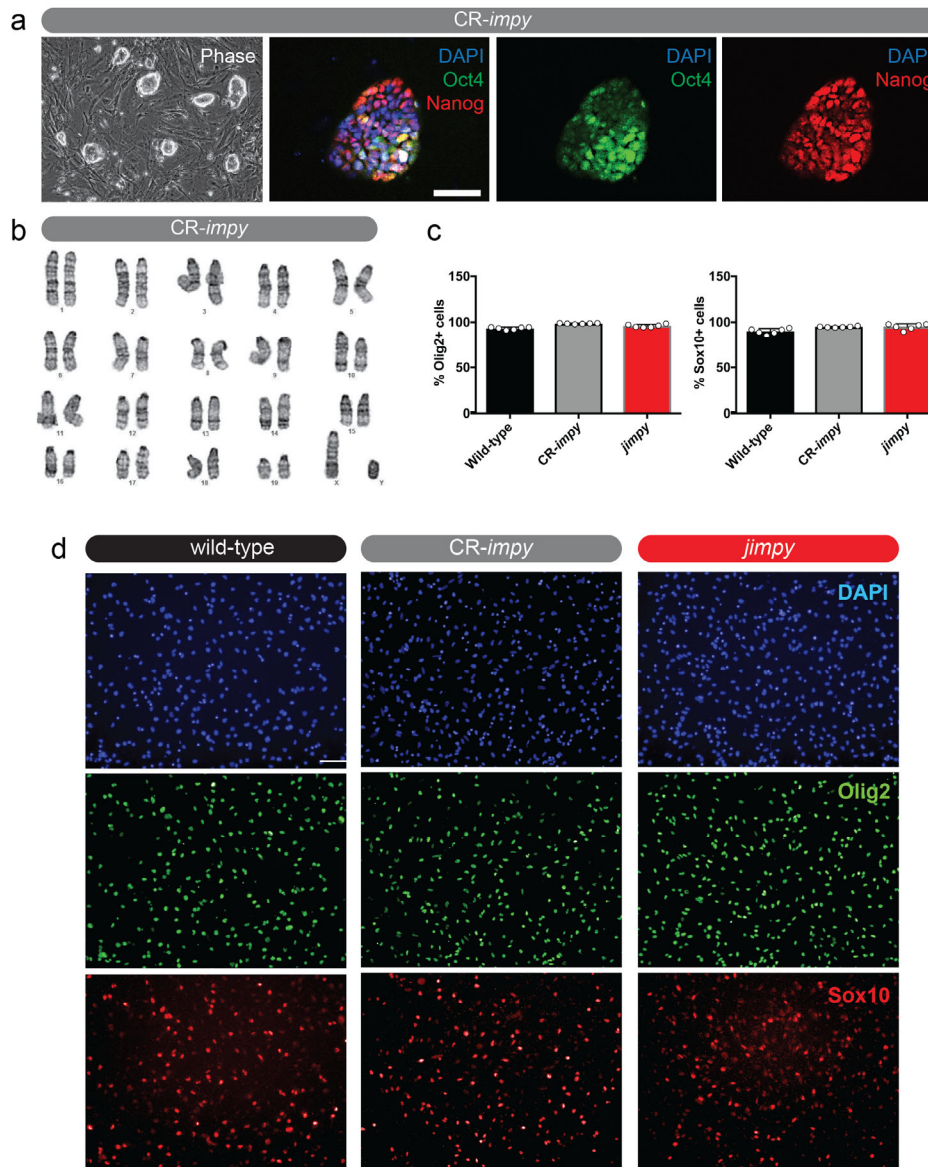

923  
924

### Extended Data Fig. 4 | Characterization of mouse iPSC lines and derivation of OPCs.

**a**, Representative phase and immunocytochemistry images of Oct4+ (green) and Nanog+ (red) iPSCs reprogrammed from CR-impy, tail-tip fibroblasts. Scale bar, 50um.

**b**, Normal karyotype of CR-impy iPSC line used to generate OPCs.

**c**, Percentage of Sox10+ and Olig2+ cells in OPCs cultures from wild-type, CR-impy, and jimpy iPSCs. Error bars show mean  $\pm$  standard deviation. n=6 technical replicates (single cell line per genotype with 6 separate wells scored).

**d**, Representative immunocytochemistry images showing relative purity of Olig2+ and Sox10+ OPCs derived from wild-type, CR-impy, and jimpy iPSCs. Scale bar, 100um.

933



934  
935

## EXTENDED DATA FIGURE 5

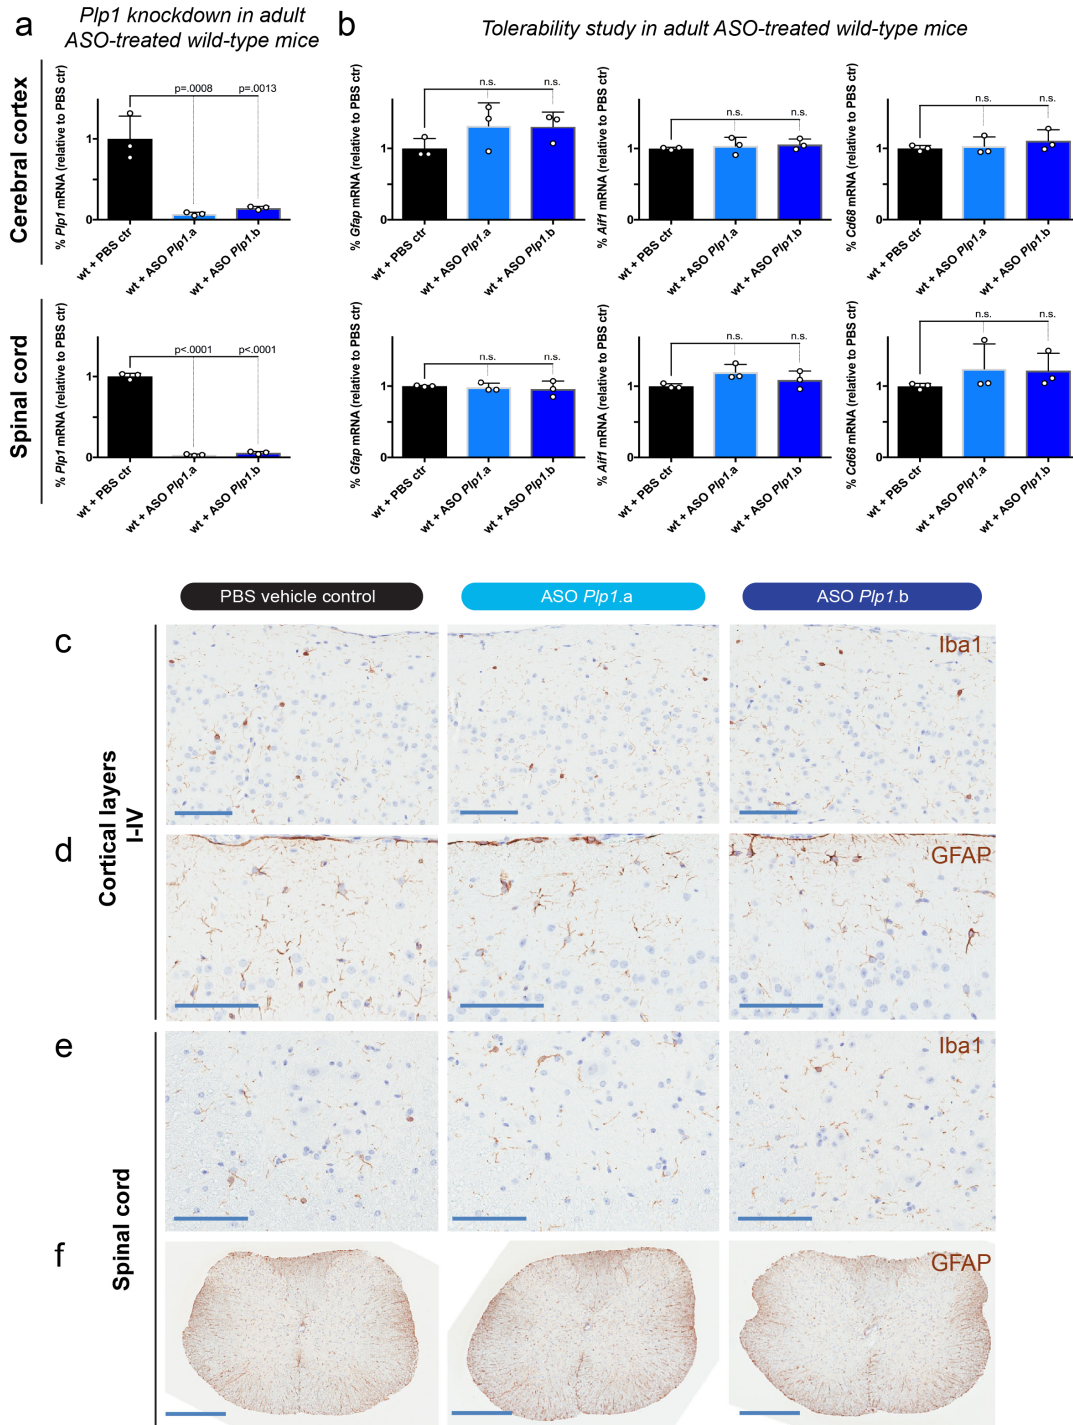

936  
937  
938  
939  
940  
941

**Extended Data Fig. 5 | *Plp1*-targeted ASOs show robust and sustained *Plp1* suppression and do not alter markers of glial activation/recruitment in wild-type adult mouse CNS.**

**a**, RT-qPCR data comparing the level of *Plp1* transcript suppression in 16 week old cerebral cortex and spinal cord of wild-type mice treated with the indicated ASOs (300ug dose) or controls at

942 week 8. Individual data points represent the mean value of 3 technical replicates for each biological  
943 replicate (n=3 separate mice). Error bars show mean  $\pm$  standard deviation. p-values calculated  
944 using one-way ANOVA with Dunnett's correction for multiple comparisons.  
945 **b**, RT-qPCR data assessing ASO tolerability by expression levels of *Gfap* (astrocyte marker), *Aif1*  
946 (microglia marker), and *Cd68* (monocyte/macrophage marker) transcripts in 16 week old cerebral  
947 cortex and spinal cord of wild-type mice treated with the indicated ASOs (300ug dose) or controls  
948 at week 8. Individual data points represent the mean value of 3 technical replicates for each  
949 biological replicate (n=3 separate mice). Error bars show mean  $\pm$  standard deviation. p-values  
950 calculated using one-way ANOVA with Dunnett's correction for multiple comparisons.  
951 **c-f**, Iba1 or GFAP immunohistochemistry (brown) with hematoxylin counterstain (purple)  
952 showing no appreciable increase among groups in staining intensity, cellularity, or shortened, thick  
953 processes that would be consistent with glial activation. (c) cortical layers I-IV Iba1 staining, scale  
954 bar = 100  $\mu$ m (d) cortical layers I-III GFAP staining, scale bar = 100  $\mu$ m. (e) spinal cord dorsal  
955 horn grey/white matter intersection Iba1 staining, scale bar = 100  $\mu$ m. (f) Spinal cord GFAP  
956 staining, scale bar = 500  $\mu$ m.

957  
958

## EXTENDED DATA FIGURE 6

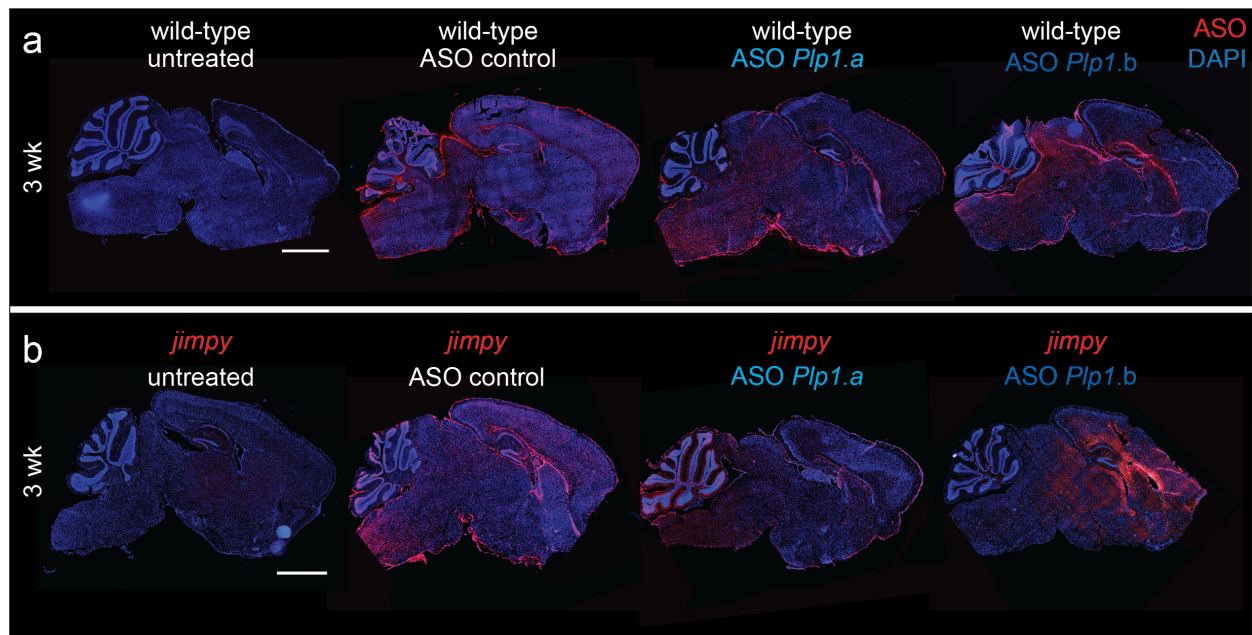

959  
960

**Extended Data Fig. 6 | *Plp1*-targeted ASOs distribute widely throughout the CNS after ICV dosing in postnatal mice.**

961 **a-b**, Representative immunohistochemical images of 3 week whole-brain sagittal sections showing  
962 ASO (red) and total DAPI+ cells (blue) in wild-type mice (a) or *jimpy* (b) mice treated with ASO-  
963 *Plp1.a*, ASO-*Plp1.b*, or a control ASO by ICV injection at birth. Scale bar, 2mm.  
964  
965

966  
967

## EXTENDED DATA FIGURE 7

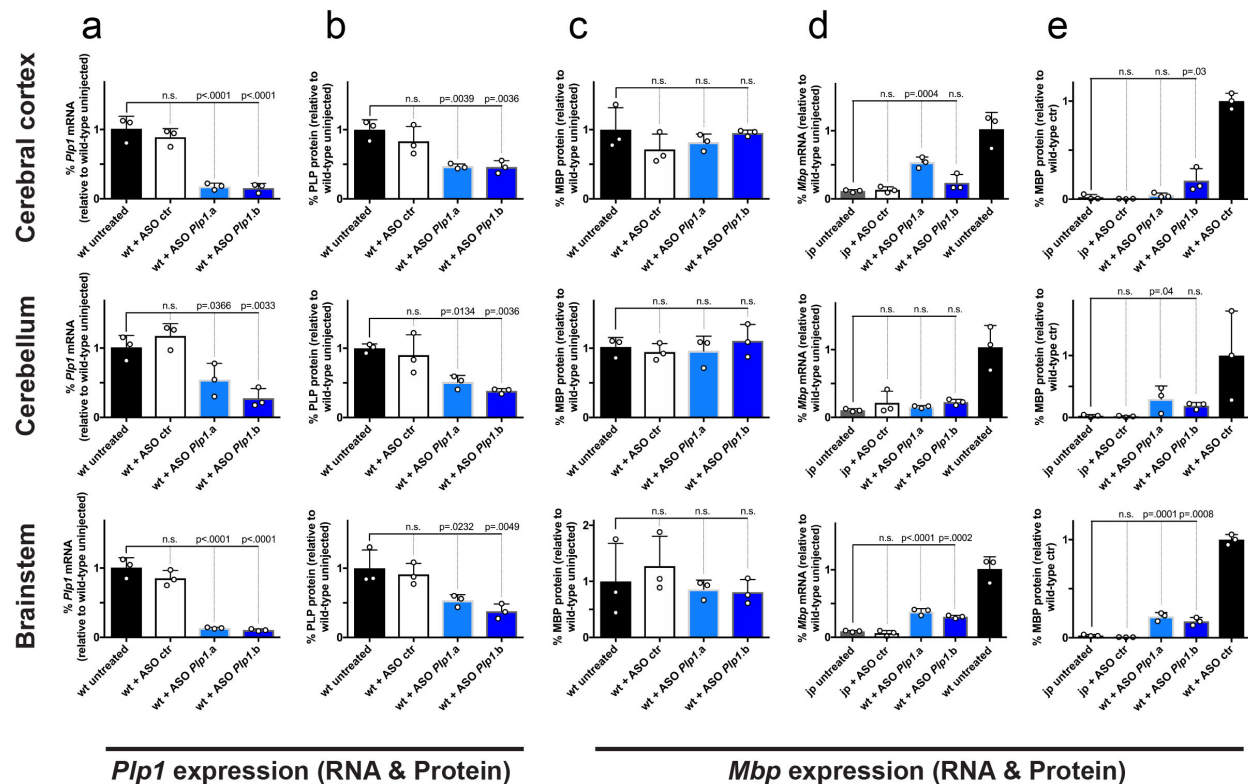

968  
969

### Extended Data Fig. 7 | *Plp1*-targeted ASOs increase MBP transcript and protein levels in *jimpy* mice.

**a**, RT-qPCR data showing the level of *Plp1* transcript suppression in 3 week old cerebral cortex, cerebellum, and brainstem of wild-type mice treated with the indicated ASOs (30ug dose) or controls at birth. Primer sites span *Plp1* exons 2-3, upstream of the *jimpy* mutation site. Individual data points represent the mean value of 4 technical replicates for each biological replicate (n=3 separate mice). Error bars show mean  $\pm$  standard deviation. p-values calculated using one-way ANOVA with Dunnett's correction for multiple comparisons.

**b**, Western blot data showing the levels of PLP in 3 week old cerebral cortex, cerebellum, and brainstem of wild-type mice treated with the indicated ASOs (30ug dose) or controls at birth. Individual data points represent biological replicates (n=3 separate mice; see Supplementary Fig. 4 for full western blot images for all samples). Error bars show mean  $\pm$  standard deviation. p-values calculated using one-way ANOVA with Dunnett's correction for multiple comparisons.

**c**, Western blot data showing the levels of MBP in 3 week old cerebral cortex, cerebellum, and brainstem of wild-type mice treated with the indicated ASOs (30ug dose) or controls at birth. Individual data points represent biological replicates (n=3 separate mice; see Supplementary Fig. 4 for full western blot images for all samples). Error bars show mean  $\pm$  standard deviation. p-values calculated using one-way ANOVA with Dunnett's correction for multiple comparisons.

**d**, RT-qPCR data showing the level of *Mbp* transcript in 3 week old cerebral cortex, cerebellum, and brainstem of *jimpy* mice treated with the indicated ASOs (30ug dose) or controls at birth.

989

990 Individual data points represent the mean value of 4 technical replicates for each biological  
991 replicate (n=3 separate mice). Error bars show mean  $\pm$  standard deviation. p-values calculated  
992 using one-way ANOVA with Dunnett's correction for multiple comparisons.  
993 e, Western blot data showing the level of MBP in 3 week old cerebral cortex, cerebellum, and  
994 brainstem of *jimpy* mice treated with the indicated ASOs (30ug dose) or controls at birth.  
995 Individual data points represent biological replicates (n=3 separate mice; see Supplementary Fig.  
996 4 for full western blot images for all samples). Error bars show mean  $\pm$  standard deviation. p-  
997 values calculated using one-way ANOVA with Dunnett's correction for multiple comparisons.

998

## EXTENDED DATA TABLE 1

999

| <b>PLP1 mutation</b>                                                                                     | <b>Patient #</b> | <b>Motor function</b>                                                                              | <b>Cognitive function</b>                                                                                                      | <b>Death</b>  | <b>Ref.</b> |
|----------------------------------------------------------------------------------------------------------|------------------|----------------------------------------------------------------------------------------------------|--------------------------------------------------------------------------------------------------------------------------------|---------------|-------------|
| Frameshift and early termination codon (c.4delG)<br><br><i>Protein absence confirmed by western blot</i> | 1                | Wheelchair bound at 35 with spasticity in all limbs                                                | No intellectual disability and verbally communicated into mid-20s. Cooperative, alert, and aware of surroundings in adulthood. | Age 47        | (1, 2)      |
|                                                                                                          | 2                | Wheelchair bound at 37 with spasticity in all limbs                                                | No intellectual disability and verbally communicated into mid-20s. Cooperative, alert, and aware of surroundings in adulthood. | Age 49        |             |
|                                                                                                          | 3                | Walked from age 4-12, spasticity in all limbs at age 25                                            | Language delay. At 22 communicated, was cooperative, and alert. At 25 could follow commands, count, and distinguish colors.    | Age 34        |             |
|                                                                                                          | 4                | Wheelchair bound at 17, gait deterioration starting at age 8, and spasticity in legs but not arms. | Able to read, follow commands, and perform arithmetic.                                                                         | None reported |             |
| Frameshift and early termination codon c.191+1G>A<br><br><i>No biochemical analysis</i>                  | 1                | Walked from age 6-9. Spastic with cerebellar dysfunction.                                          | Attends normal school and can read and write.                                                                                  | None reported | (3)         |
| Loss of start codon (c.3G>A)<br><br><i>No biochemical analysis</i>                                       | 1                | Early life motor dysfunction with spasticity in arms and legs. Further decline at age 33.          | Early life intellectual disability. Further decline at age 33.                                                                 | None reported | (2, 4)      |
|                                                                                                          | 2                | Early life hypertonia and spasticity in arms and legs. Wheelchair bound at 6.                      | Language delay. Moderately retarded development.                                                                               | None reported |             |
|                                                                                                          | 3                | Never walked and spasticity in legs by age 1, progressing to arms with age.                        | Mild cognitive deficits at age 20.                                                                                             | None reported | (5)         |

1000

1001

1002

### Extended Data Table 1

Table containing details of published reports of *PLP1*-null patients.

## SUPPLEMENTARY FIGURE 1

Metadata for mouse CRISPR survival cohort from Ellitt et al. ver.12-25-18

| Identifier | Date of birth | Date of death | Euthanized at 18 month endpoint? | Lifespan (days) | Genotype  | Phenotype | Censored (Y/N) | Censor Reason            | mean time to fall (seconds) |              |              |               | total distance traveled (meters) |                 |                 |                  |
|------------|---------------|---------------|----------------------------------|-----------------|-----------|-----------|----------------|--------------------------|-----------------------------|--------------|--------------|---------------|----------------------------------|-----------------|-----------------|------------------|
|            |               |               |                                  |                 |           |           |                |                          | Rotarod 3 wk                | Rotarod 2 mo | Rotarod 6 mo | Rotarod 18 mo | Open field 3 wk                  | Open field 2 mo | Open field 6 mo | Open field 18 mo |
| CR200301   | 11/13/2016    | 4/22/2018     | n                                | 525             | wild-type | none      | N              |                          | 69.3                        | 70.9         | 61.8         |               | 22.8                             | 17.9            | 12.5            |                  |
| CR200090   | 11/13/2016    | 5/14/2018     | y                                | 547             | wild-type | none      | N              |                          | 144.0                       | 104.1        | 60.1         | 43.0          | 17.0                             | 17.4            | 10.8            | 13.2             |
| CR200091   | 11/13/2016    | 5/14/2018     | y                                | 547             | wild-type | none      | N              |                          | 81.3                        | 103.4        | 77.5         | 61.3          | 19.3                             | 18.8            | 10.2            | 15.4             |
| CR200302   | 11/15/2016    | 12/5/2017     | n                                | 385             | CR-impv   | none      | N              |                          | 100.7                       | 120.9        | 108.0        |               | 10.9                             | 15.0            | 15.5            |                  |
| CR200303   | 11/15/2016    | 12/28/2017    | n                                | 408             | CR-impv   | none      | N              |                          | 115.3                       | 138.0        | 74.2         |               | 8.6                              | 14.3            | 17.7            |                  |
| CR200304   | 11/15/2016    | 5/6/2018      | n                                | 537             | CR-impv   | none      | N              |                          | 95.7                        | 138.3        | 55.2         |               | 13.7                             | 11.0            | 11.5            |                  |
| CR200092   | 11/15/2016    | 5/14/2018     | y                                | 545             | CR-impv   | none      | N              |                          | 139.4                       | 106.3        | 66.2         | 16.3          | 10.1                             | 10.2            | 10.5            | 7.3              |
| CR200093   | 11/15/2016    | 5/14/2018     | y                                | 545             | CR-impv   | none      | N              |                          | 72.7                        | 117.7        | 116.3        | 29.2          | 17.1                             | 7.9             | 17.3            | 22.0             |
| CR200305   | 11/15/2016    | 12/8/2016     | n                                | 23              | impv      | severe    | N              |                          | 39.1                        |              |              |               | 3.9                              |                 |                 |                  |
| CR200306   | 11/15/2016    | 12/7/2016     | n                                | 22              | impv      | severe    | N              |                          | 21.0                        |              |              |               | 2.4                              |                 |                 |                  |
| CR200307   | 11/15/2016    | 12/9/2016     | n                                | 24              | impv      | severe    | N              |                          | 20.7                        |              |              |               | 1.0                              |                 |                 |                  |
| CR200308   | 11/15/2016    | 12/5/2016     | n                                | 20              | impv      | severe    | N              |                          | 12.9                        |              |              |               | 5.5                              |                 |                 |                  |
| CR200309   | 11/15/2016    | 12/6/2016     | n                                | 21              | impv      | severe    | N              |                          | 4.7                         |              |              |               | 6.8                              |                 |                 |                  |
| CR200310   | 11/16/2016    | 12/17/2016    | n                                | 31              | impv      | severe    | N              |                          | 38.7                        |              |              |               | 0.4                              |                 |                 |                  |
| CR200311   | 11/16/2016    | 12/10/2016    | n                                | 24              | impv      | severe    | N              |                          | 31.9                        |              |              |               | 0.6                              |                 |                 |                  |
| CR200312   | 11/17/2016    | 4/30/2018     | n                                | 529             | wild-type | none      | N              |                          | 101.6                       | 84.7         | 52.9         |               | 19.0                             | 7.0             | 8.1             |                  |
| CR200096   | 11/17/2016    | 5/14/2018     | y                                | 543             | wild-type | none      | N              |                          | 93.0                        | 219.3        | 125.7        | 29.1          | 20.0                             | 25.7            | 12.7            | 12.5             |
| CR200313   | 11/17/2016    | 3/27/2018     | n                                | 495             | wild-type | none      | N              |                          | 156.7                       | 70.4         | 52.6         |               | 14.4                             | 17.0            | 9.3             |                  |
| CR200097   | 11/17/2016    | 5/14/2018     | y                                | 543             | wild-type | none      | N              |                          | 55.9                        | 86.0         | 118.8        | 71.9          | 15.6                             | 18.0            | 25.1            | 14.1             |
| CR200094   | 11/18/2016    | 5/14/2018     | y                                | 542             | CR-impv   | none      | N              |                          | 65.8                        | 74.0         | 111.1        | 16.3          | 22.5                             | 15.8            | 16.2            | 7.2              |
| CR200314   | 11/18/2016    | 3/19/2018     | n                                | 486             | CR-impv   | none      | N              |                          | 69.6                        | 71.3         | 90.9         |               | 21.1                             | 17.0            | 15.5            |                  |
| CR200095   | 11/18/2016    | 5/14/2018     | y                                | 542             | CR-impv   | none      | N              |                          | 110.1                       | 128.3        | 148.1        | 29.2          | 19.1                             | 26.4            | 19.6            | 27.6             |
| CR200315   | 11/26/2016    | 12/22/2016    | n                                | 26              | impv      | severe    | N              |                          | 2.7                         |              |              |               | 1.8                              |                 |                 |                  |
| CR200316   | 11/26/2016    | 12/18/2016    | n                                | 22              | impv      | severe    | N              |                          | 27.3                        |              |              |               | 0.5                              |                 |                 |                  |
| CR200317   | 11/26/2016    | 12/18/2016    | n                                | 22              | impv      | severe    | N              |                          | 24.2                        |              |              |               | 0.9                              |                 |                 |                  |
| CR200318   | 11/26/2016    | 12/20/2016    | n                                | 24              | impv      | severe    | N              |                          | 26.9                        |              |              |               | 1.2                              |                 |                 |                  |
| CR200319   | 11/26/2016    | 12/19/2016    | n                                | 23              | impv      | severe    | N              |                          | 41.4                        |              |              |               | 1.0                              |                 |                 |                  |
| CR200320   | 12/12/2016    | 1/5/2017      | n                                | 24              | impv      | severe    | N              |                          |                             |              |              |               |                                  |                 |                 |                  |
| CR200321   | 12/12/2016    | 12/31/2016    | n                                | 19              | impv      | severe    | N              |                          |                             |              |              |               |                                  |                 |                 |                  |
| CR200322   | 12/12/2016    | 11/16/2017    | n                                | 339             | CR-impv   | none      | N              |                          |                             | 102.9        | 88.2         |               | 25.229                           | 26.0            |                 |                  |
| CR200323   | 12/12/2016    | 6/27/2018     | y                                | 562             | CR-impv   | none      | N              |                          |                             | 81.1         | 89.4         | 43.9          |                                  | 15.418          | 17.8            | 19.6             |
| CR200324   | 3/30/2017     | 4/20/2017     | n                                | 21              | impv      | severe    | N              |                          |                             |              |              |               |                                  |                 |                 |                  |
| CR200325   | 3/30/2017     | 4/20/2017     | n                                | 21              | impv      | severe    | N              |                          |                             |              |              |               |                                  |                 |                 |                  |
| CR200326   | 3/30/2017     | 4/26/2017     | n                                | 27              | impv      | severe    | N              |                          |                             |              |              |               |                                  |                 |                 |                  |
| CR200327   | 3/30/2017     | 4/24/2017     | n                                | 25              | impv      | severe    | N              |                          |                             |              |              |               |                                  |                 |                 |                  |
| CR200328   | 11/13/2016    | 10/1/2017     | n                                | 322             | wild-type | none      | Y              | Euthanized inadvertently | 92.7                        | 135.4        | 63.5         |               | 31.8                             | 18.3            | 8.9             |                  |
| CR200329   | 11/13/2016    | 10/1/2017     | n                                | 322             | wild-type | none      | Y              | Euthanized inadvertently | 148.7                       | 126.7        | 102.4        |               | 18.6                             | 13.8            | 6.7             |                  |
| CR200330   | 11/13/2016    | 10/1/2017     | n                                | 322             | wild-type | none      | Y              | Euthanized inadvertently | 85.7                        | 109.3        | 120.0        |               | 15.3                             | 19.4            | 19.1            |                  |
| CR200081   | 11/15/2016    | 6/1/2017      | n                                | 198             | wild-type | none      | Y              | Tissue collection        | 196.0                       | 160.7        | 145.0        |               | 13.5                             | 20.9            | 10.3            |                  |
| CR200082   | 11/15/2016    | 6/1/2017      | n                                | 198             | CR-impv   | none      | Y              | Tissue collection        | 132.3                       | 91.5         | 99.1         |               | 13.5                             | 15.1            | 20.3            |                  |
| CR200083   | 11/15/2016    | 6/2/2017      | n                                | 199             | CR-impv   | none      | Y              | Tissue collection        | 120.5                       | 93.6         | 96.9         |               | 21.5                             | 23.7            | 25.2            |                  |
| CR200084   | 11/15/2016    | 6/2/2017      | n                                | 199             | wild-type | none      | Y              | Tissue collection        | 170.4                       | 137.7        | 78.6         |               | 23.7                             | 11.5            | 7.3             |                  |
| CR200061   | 11/15/2016    | 5/25/2017     | n                                | 191             | CR-impv   | none      | Y              | Tissue collection        | 102.5                       | 111.7        | 105.4        |               | 21.1                             | 12.2            | 16.2            |                  |
| CR200062   | 11/15/2016    | 5/25/2017     | n                                | 191             | CR-impv   | none      | Y              | Tissue collection        | 56.4                        | 122.4        | 63.4         |               | 13.3                             | 15.1            | 18.3            |                  |
| CR200063   | 11/15/2016    | 5/25/2017     | n                                | 191             | wild-type | none      | Y              | Tissue collection        | 109.3                       | 115.3        | 57.3         |               | 26.3                             | 26.3            | 10.8            |                  |
| CR200064   | 11/15/2016    | 5/25/2017     | n                                | 191             | wild-type | none      | Y              | Tissue collection        | 88.7                        | 101.3        | 82.0         |               | 17.4                             | 15.6            | 8.0             |                  |
| CR200065   | 11/16/2016    | 5/30/2017     | n                                | 195             | CR-impv   | none      | Y              | Tissue collection        | 42.5                        | 100.8        | 131.3        |               | 10.0                             | 6.4             | 6.7             |                  |
| CR200075   | 11/17/2016    | 5/31/2017     | n                                | 195             | wild-type | none      | Y              | Tissue collection        | 82.1                        | 32.1         | 23.3         |               | 24.0                             | 21.3            | 21.1            |                  |
| CR200076   | 11/17/2016    | 5/31/2017     | n                                | 195             | wild-type | none      | Y              | Tissue collection        | 162.8                       | 70.8         | 98.9         |               | 20.5                             | 11.6            | 9.4             |                  |
| CR200077   | 11/17/2016    | 5/31/2017     | n                                | 195             | wild-type | none      | Y              | Tissue collection        | 120.6                       | 95.5         | 108.5        |               | 20.5                             | 26.0            | 14.1            |                  |
| CR200078   | 11/18/2016    | 6/13/2017     | n                                | 207             | CR-impv   | none      | Y              | Tissue collection        | 40.5                        | 102.0        | 97.6         |               | 19.7                             | 13.0            | 7.8             |                  |
| CR200079   | 11/18/2016    | 6/13/2017     | n                                | 207             | wild-type | none      | Y              | Tissue collection        | 82.2                        | 130.0        | 77.2         |               | 12.8                             | 15.6            | 3.8             |                  |
| CR200080   | 11/18/2016    | 6/12/2017     | n                                | 206             | CR-impv   | none      | Y              | Tissue collection        | 87.0                        | 78.1         | 63.5         |               | 26.3                             | 18.6            | 15.8            |                  |
| CR200085   | 11/18/2016    | 6/12/2017     | n                                | 206             | wild-type | none      | Y              | Tissue collection        | 75.8                        | 113.4        | 104.0        |               | 19.7                             | 9.3             | 8.3             |                  |
| CR200071   | 11/18/2016    | 6/12/2017     | n                                | 206             | CR-impv   | none      | Y              | Tissue collection        | 59.0                        | 142.3        | 134.3        |               | 8.0                              | 16.5            | 8.3             |                  |
| CR200086   | 11/18/2016    | 6/13/2017     | n                                | 207             | CR-impv   | none      | Y              | Tissue collection        | 79.7                        | 112.2        | 100.1        |               | 14.3                             | 8.512           | 12.0            |                  |
| CR200098   | 11/18/2016    | 6/13/2017     | n                                | 207             | wild-type | none      | Y              | Tissue collection        | 90.6                        | 130.3        | 115.3        |               | 17.9                             | 19.54           | 13.0            |                  |
| CR200066   | 11/19/2016    | 5/30/2017     | n                                | 192             | CR-impv   | none      | Y              | Tissue collection        | 88.4                        | 124.4        | 82.9         |               | 14.0                             | 14.136          | 0.6             |                  |
| CR200067   | 11/19/2016    | 5/30/2017     | n                                | 192             | CR-impv   | none      | Y              | Tissue collection        | 131.7                       | 146.0        | 68.2         |               | 11.6                             | 13.449          | 9.8             |                  |
| CR200068   | 11/19/2016    | 5/30/2017     | n                                | 192             | wild-type | none      | Y              | Tissue collection        | 82.5                        | 119.3        | 126.1        |               | 14.1                             | 20.689          | 14.5            |                  |
| CR200069   | 11/22/2016    | 5/30/2017     | n                                | 189             | wild-type | none      | Y              | Tissue collection        | 88.4                        | 67.0         | 41.5         |               | 19.0                             | 9.404           | 8.4             |                  |
| CR200070   | 11/22/2016    | 5/30/2017     | n                                | 189             | wild-type | none      | Y              | Tissue collection        | 88.3                        | 80.6         | 77.4         |               | 20.1                             | 9.051           | 5.2             |                  |
| CR200072   | 11/22/2016    | 6/1/2017      | n                                | 191             | wild-type | none      | Y              | Tissue collection        | 110.7                       | 170.0        | 124.3        |               | 21.7                             | 19.759          | 11.8            |                  |
| CR200073   | 11/22/2016    | 6/1/2017      | n                                | 191             | wild-type | none      | Y              | Tissue collection        | 145.0                       | 152.3        | 116.1        |               | 13.5                             | 22.028          | 11.4            |                  |
| CR200331   | 11/26/2016    | 5/23/2017     | n                                | 178             | CR-impv   | none      | Y              | Euthanized inadvertently | 110.0                       | 196.0        |              |               | 24.3                             | 16.452          |                 |                  |
| CR200074   | 12/12/2016    | 6/1/2017      | n                                | 171             | CR-impv   | none      | Y              | Tissue collection        |                             | 94.2         |              |               |                                  | 23.557          |                 |                  |

### Supplementary Figure 1

Table of metadata for all mice in Kaplan-Meier survival plot in Fig. 1b. Also included are raw data values for rotarod and open field assays in Fig. 2c, d.

1010  
1011

## SUPPLEMENTARY FIGURE 2

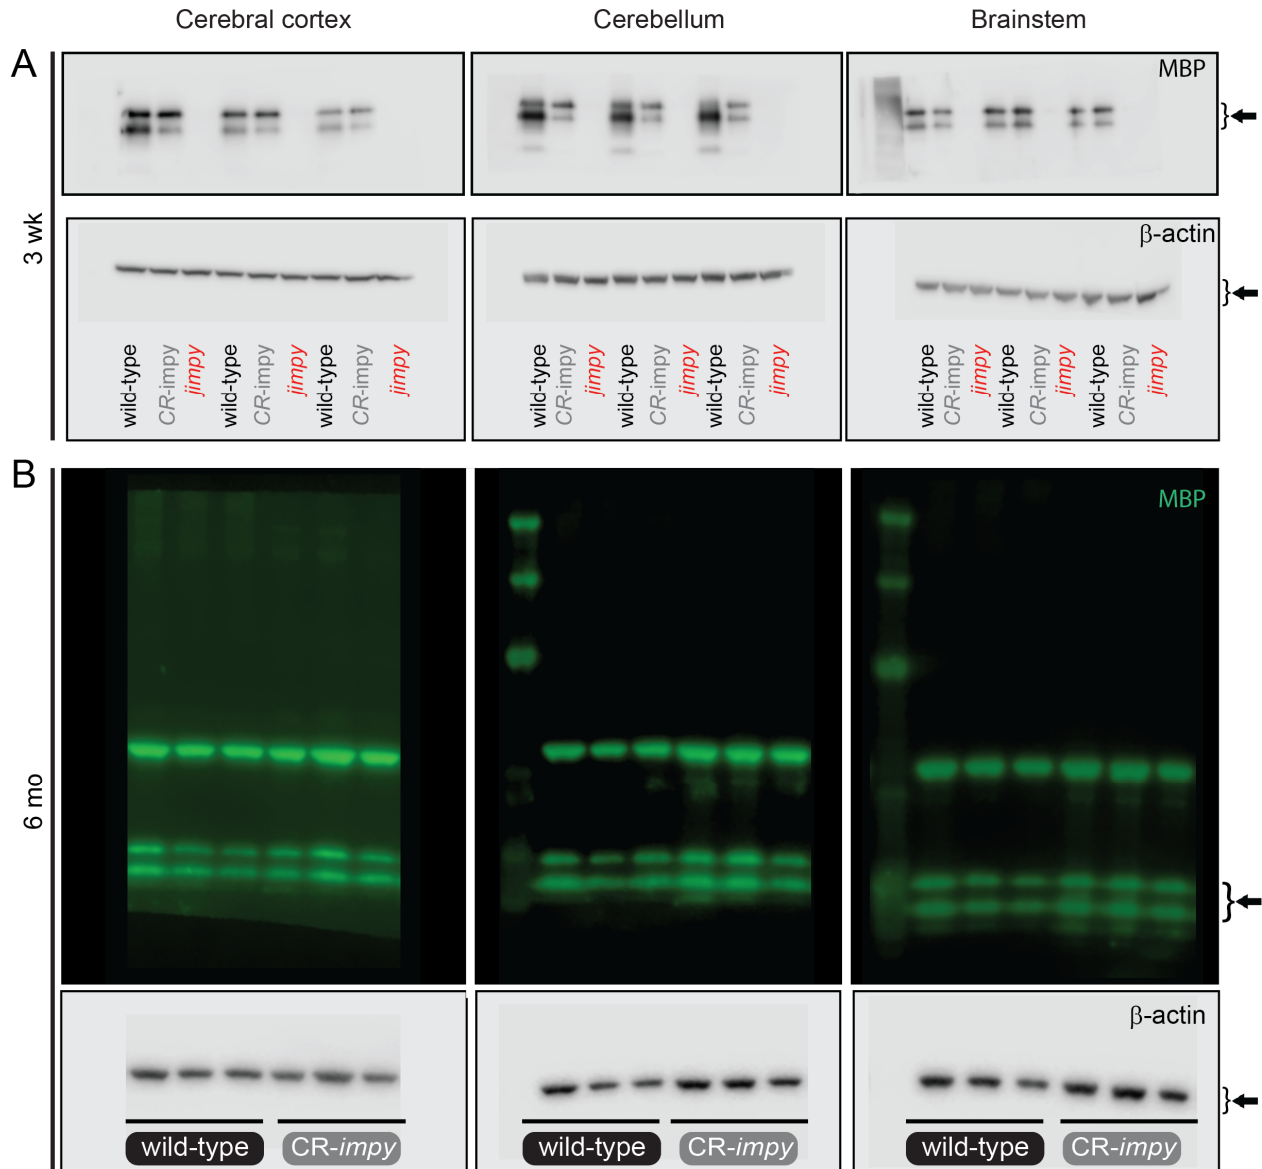

1012  
1013  
1014  
1015  
1016  
1017

### Supplementary Figure 2

**a-b,** Labeled raw images of western blots for all samples in Extended Data Figs. 1d, f. The upper bands in the fluorescent blots in panel B are carry over from chemiluminescent detection of  $\beta$ -actin (bottom panel).



## SUPPLEMENTARY FIGURE 3

| Metadata for mouse ASO survival cohort from Elitt et al. ver.12-25-18 |               |               |                                 |                 |              |             |           |                                                        |                 | mean time to fall (seconds) |                 |                 | total distance traveled (meters) |                 |  |
|-----------------------------------------------------------------------|---------------|---------------|---------------------------------|-----------------|--------------|-------------|-----------|--------------------------------------------------------|-----------------|-----------------------------|-----------------|-----------------|----------------------------------|-----------------|--|
| Identifier                                                            | Date of birth | Date of death | Euthanized at 8 month endpoint? | Lifespan (days) | Genotype     | Treatment   | Phenotype | Additional phenotype notes                             | Rotarod 2 mo    | Rotarod 4 mo                | Rotarod 6 mo    | Open field 2 mo | Open field 4 mo                  | Open field 6 mo |  |
| ASO00091                                                              | 11/23/2017    | 7/20/2018     | y                               | 239             | <i>jimpy</i> | ASO P1p1.a  | mild      | Periorbital area inflammation, left eye                | 32.9            | 22.4                        | 5.6             | 22.0            | 18.0                             | 18.0            |  |
| ASO00095                                                              | 11/23/2017    | 7/20/2018     | y                               | 239             | <i>jimpy</i> | ASO P1p1.a  | mild      | Periorbital area inflammation, bilateral               | 22.3            | 24.6                        | unable to train | 19.6            | 13.7                             | 14.0            |  |
| ASO00051                                                              | 12/7/2017     | 12/28/2017    | n                               | 21              | <i>jimpy</i> | uninjected  | severe    |                                                        |                 |                             |                 |                 |                                  |                 |  |
| ASO00052                                                              | 12/7/2017     | 12/28/2017    | n                               | 21              | <i>jimpy</i> | ASO control | severe    |                                                        |                 |                             |                 |                 |                                  |                 |  |
| ASO00053                                                              | 12/7/2017     | 12/29/2017    | n                               | 22              | <i>jimpy</i> | ASO control | severe    |                                                        |                 |                             |                 |                 |                                  |                 |  |
| ASO00054                                                              | 12/7/2017     | 12/27/2017    | n                               | 20              | <i>jimpy</i> | ASO control | severe    |                                                        |                 |                             |                 |                 |                                  |                 |  |
| ASO00055                                                              | 12/8/2017     | 12/24/2017    | n                               | 16              | <i>jimpy</i> | uninjected  | severe    |                                                        |                 |                             |                 |                 |                                  |                 |  |
| ASO00056                                                              | 12/8/2017     | 12/27/2017    | n                               | 19              | <i>jimpy</i> | uninjected  | severe    |                                                        |                 |                             |                 |                 |                                  |                 |  |
| ASO00057                                                              | 12/11/2017    | 12/26/2017    | n                               | 15              | <i>jimpy</i> | uninjected  | severe    |                                                        |                 |                             |                 |                 |                                  |                 |  |
| ASO00058                                                              | 12/5/2017     | 12/25/2017    | n                               | 20              | <i>jimpy</i> | uninjected  | severe    |                                                        |                 |                             |                 |                 |                                  |                 |  |
| ASO00059                                                              | 12/5/2017     | 12/25/2017    | n                               | 20              | <i>jimpy</i> | uninjected  | severe    |                                                        |                 |                             |                 |                 |                                  |                 |  |
| ASO000510                                                             | 12/8/2017     | 12/28/2017    | n                               | 20              | <i>jimpy</i> | uninjected  | severe    | Found with hind-limb paralysis, required euthanization |                 |                             |                 |                 |                                  |                 |  |
| ASO000511                                                             | 12/8/2017     | 12/30/2017    | n                               | 22              | <i>jimpy</i> | uninjected  | severe    |                                                        |                 |                             |                 |                 |                                  |                 |  |
| ASO000512                                                             | 12/8/2017     | 12/28/2017    | n                               | 20              | <i>jimpy</i> | uninjected  | severe    | Found with hind-limb paralysis, required euthanization |                 |                             |                 |                 |                                  |                 |  |
| AS000103                                                              | 12/27/2017    | 8/27/2018     | y                               | 243             | <i>jimpy</i> | ASO P1p1.b  | mild      | Periorbital area inflammation, right eye               | unable to train | unable to train             | unable to train | 13.2            | 6.2                              | 4.3             |  |
| AS000104                                                              | 12/27/2017    | 8/27/2018     | y                               | 243             | <i>jimpy</i> | ASO P1p1.b  | mild      |                                                        | 39.4            | 49.5                        | 27.8            | 14.5            | 9.0                              | 11.3            |  |
| ASO000513                                                             | 12/27/2017    | 1/18/2018     | n                               | 22              | <i>jimpy</i> | uninjected  | severe    |                                                        |                 |                             |                 |                 |                                  |                 |  |
| AS000105b                                                             | 12/28/2017    | 8/27/2018     | y                               | 242             | <i>jimpy</i> | ASO P1p1.b  | mild      |                                                        | 51.5            | 37.2                        | 36.9            | 13.8            | 12.7                             | 8.8             |  |
| AS000106                                                              | 12/28/2017    | 8/27/2018     | y                               | 242             | <i>jimpy</i> | ASO P1p1.b  | mild      |                                                        | 34.7            | 27.4                        | 37.2            | 15.0            | 15.5                             | 8.9             |  |
| AS000107                                                              | 12/30/2017    | 8/27/2018     | y                               | 240             | <i>jimpy</i> | ASO P1p1.a  | mild      |                                                        | unable to train | unable to train             | unable to train | 11.3            | 15.7                             | 12.8            |  |
| AS000108                                                              | 12/30/2017    | 8/27/2018     | y                               | 240             | <i>jimpy</i> | ASO P1p1.a  | mild      | Periorbital area inflammation, bilateral               | unable to train | 17.0                        | unable to train | 10.1            | 15.1                             | 18.5            |  |
| AS000109                                                              | 12/31/2017    | 8/27/2018     | y                               | 239             | <i>jimpy</i> | ASO P1p1.a  | mild      |                                                        | 14.3            | 34.1                        | 3.3             | 15.1            | 14.2                             | 10.7            |  |
| ASO000514                                                             | 12/18/2017    | 1/5/2018      | n                               | 18              | <i>jimpy</i> | uninjected  | severe    |                                                        |                 |                             |                 |                 |                                  |                 |  |
| ASO000515                                                             | 12/18/2017    | 1/5/2018      | n                               | 18              | <i>jimpy</i> | uninjected  | severe    |                                                        |                 |                             |                 |                 |                                  |                 |  |
| ASO000516                                                             | 12/18/2017    | 1/4/2018      | n                               | 17              | <i>jimpy</i> | uninjected  | severe    |                                                        |                 |                             |                 |                 |                                  |                 |  |
| ASO000517                                                             | 1/6/2018      | 1/25/2018     | n                               | 19              | <i>jimpy</i> | ASO control | severe    |                                                        |                 |                             |                 |                 |                                  |                 |  |
| ASO000518                                                             | 1/6/2018      | 1/25/2018     | n                               | 19              | <i>jimpy</i> | ASO control | severe    |                                                        |                 |                             |                 |                 |                                  |                 |  |
| ASO000519                                                             | 12/29/2017    | 1/18/2018     | n                               | 20              | <i>jimpy</i> | uninjected  | severe    |                                                        |                 |                             |                 |                 |                                  |                 |  |
| AS000115                                                              | 1/22/2018     | 9/7/2018      | y                               | 228             | <i>jimpy</i> | ASO P1p1.b  | mild      |                                                        | 41.9            | 19.2                        | 8.1             | 11.9            | 8.4                              | 3.3             |  |
| ASO000520                                                             | 1/22/2018     | 3/30/2018     | n                               | 67              | <i>jimpy</i> | ASO P1p1.b  | mild      |                                                        | 31.1            | dead                        | dead            | 20.5            | dead                             | dead            |  |
| AS000117                                                              | 1/22/2018     | 9/7/2018      | y                               | 228             | <i>jimpy</i> | ASO P1p1.b  | mild      |                                                        | 40.1            | unable to train             | unable to train | 14.8            | 16.4                             | 18.6            |  |
| AS000110                                                              | 1/18/2018     | 9/17/2018     | y                               | 242             | <i>jimpy</i> | ASO P1p1.b  | mild      | Upper back inflammation                                | unable to train | unable to train             | unable to train | 23.9            | 25.2                             | 17.3            |  |
| ASO00096                                                              | 12/7/2017     | 7/23/2018     | y                               | 228             | wild-type    | ASO control | none      |                                                        |                 |                             |                 |                 |                                  |                 |  |
| ASO00097                                                              | 12/7/2017     | 7/23/2018     | y                               | 228             | wild-type    | ASO control | none      |                                                        |                 |                             |                 |                 |                                  |                 |  |
| ASO00099                                                              | 12/7/2017     | 7/23/2018     | y                               | 228             | wild-type    | ASO control | none      |                                                        |                 |                             |                 |                 |                                  |                 |  |
| AS000100                                                              | 12/5/2017     | 7/23/2018     | y                               | 230             | wild-type    | uninjected  | none      |                                                        | 111.1           | 110.8                       | 63.7            | 8.2             | 1.4                              | 3.9             |  |
| AS000101                                                              | 12/5/2017     | 7/23/2018     | y                               | 230             | wild-type    | uninjected  | none      |                                                        | 76.8            | 94.9                        | 64.6            | 12.0            | 3.3                              | 2.9             |  |
| AS000102                                                              | 12/5/2017     | 7/23/2018     | y                               | 230             | wild-type    | uninjected  | none      |                                                        | 53.1            | 54.3                        | 67.0            | 8.0             | 7.9                              | 3.8             |  |
| AS000111                                                              | 1/19/2018     | 9/17/2018     | y                               | 241             | wild-type    | uninjected  | none      |                                                        | 84.0            | 80.5                        | 67.4            | 37.2            | 32.9                             | 21.7            |  |
| AS000112                                                              | 1/19/2018     | 9/17/2018     | y                               | 241             | wild-type    | uninjected  | none      |                                                        | 107.0           | 61.0                        | 76.3            | 17.9            | 7.5                              | 6.2             |  |
| AS000122                                                              | 4/5/2018      | 12/14/2018    | y                               | 253             | wild-type    | ASO control | none      |                                                        |                 |                             | 3.7             |                 |                                  | 14.3            |  |
| AS000123                                                              | 4/5/2018      | 12/14/2018    | y                               | 253             | wild-type    | ASO control | none      |                                                        |                 |                             | 18.3            |                 |                                  | 1.8             |  |
| AS000124                                                              | 4/5/2018      | 12/14/2018    | y                               | 253             | wild-type    | ASO control | none      |                                                        |                 |                             | 89.4            |                 |                                  | 20.5            |  |
| AS000125                                                              | 4/5/2018      | 12/14/2018    | y                               | 253             | wild-type    | ASO control | none      |                                                        |                 |                             | 107.1           |                 |                                  | 13.2            |  |
| AS000126                                                              | 4/13/2018     | 12/13/2018    | y                               | 244             | wild-type    | ASO control | none      |                                                        |                 |                             | 123.7           |                 |                                  | 13.0            |  |
| AS000127                                                              | 4/13/2018     | 12/13/2018    | y                               | 244             | wild-type    | ASO control | none      |                                                        |                 |                             | 45.4            |                 |                                  | 20.4            |  |
| AS000128                                                              | 4/14/2018     | 12/14/2018    | y                               | 244             | wild-type    | ASO control | none      |                                                        |                 |                             |                 |                 |                                  |                 |  |
| ASO000521                                                             | 5/4/2018      |               | ongoing (still alive)           |                 | wild-type    | ASO control | none      |                                                        |                 |                             |                 |                 |                                  |                 |  |
| ASO000522                                                             | 5/4/2018      |               |                                 |                 | wild-type    | ASO control | none      |                                                        |                 |                             |                 |                 |                                  |                 |  |

### Supplementary Figure 3

Table of metadata for all mice in Kaplan-Meier survival plot in Fig. 4c (as of 12-25-18 with two mice not yet at the 8 month endpoint). We noted 5 of 13 of ASO-treated *jimpy* mice in our survival cohort developed periorbital or upper back skin inflammation. The underlying cause of this is unknown as it was not observed in ASO treated wild-type littermates. Also included are raw data values for rotarod and open field assays in Fig. 4i, j.

1028  
1029

**SUPPLEMENTARY FIGURE 4**

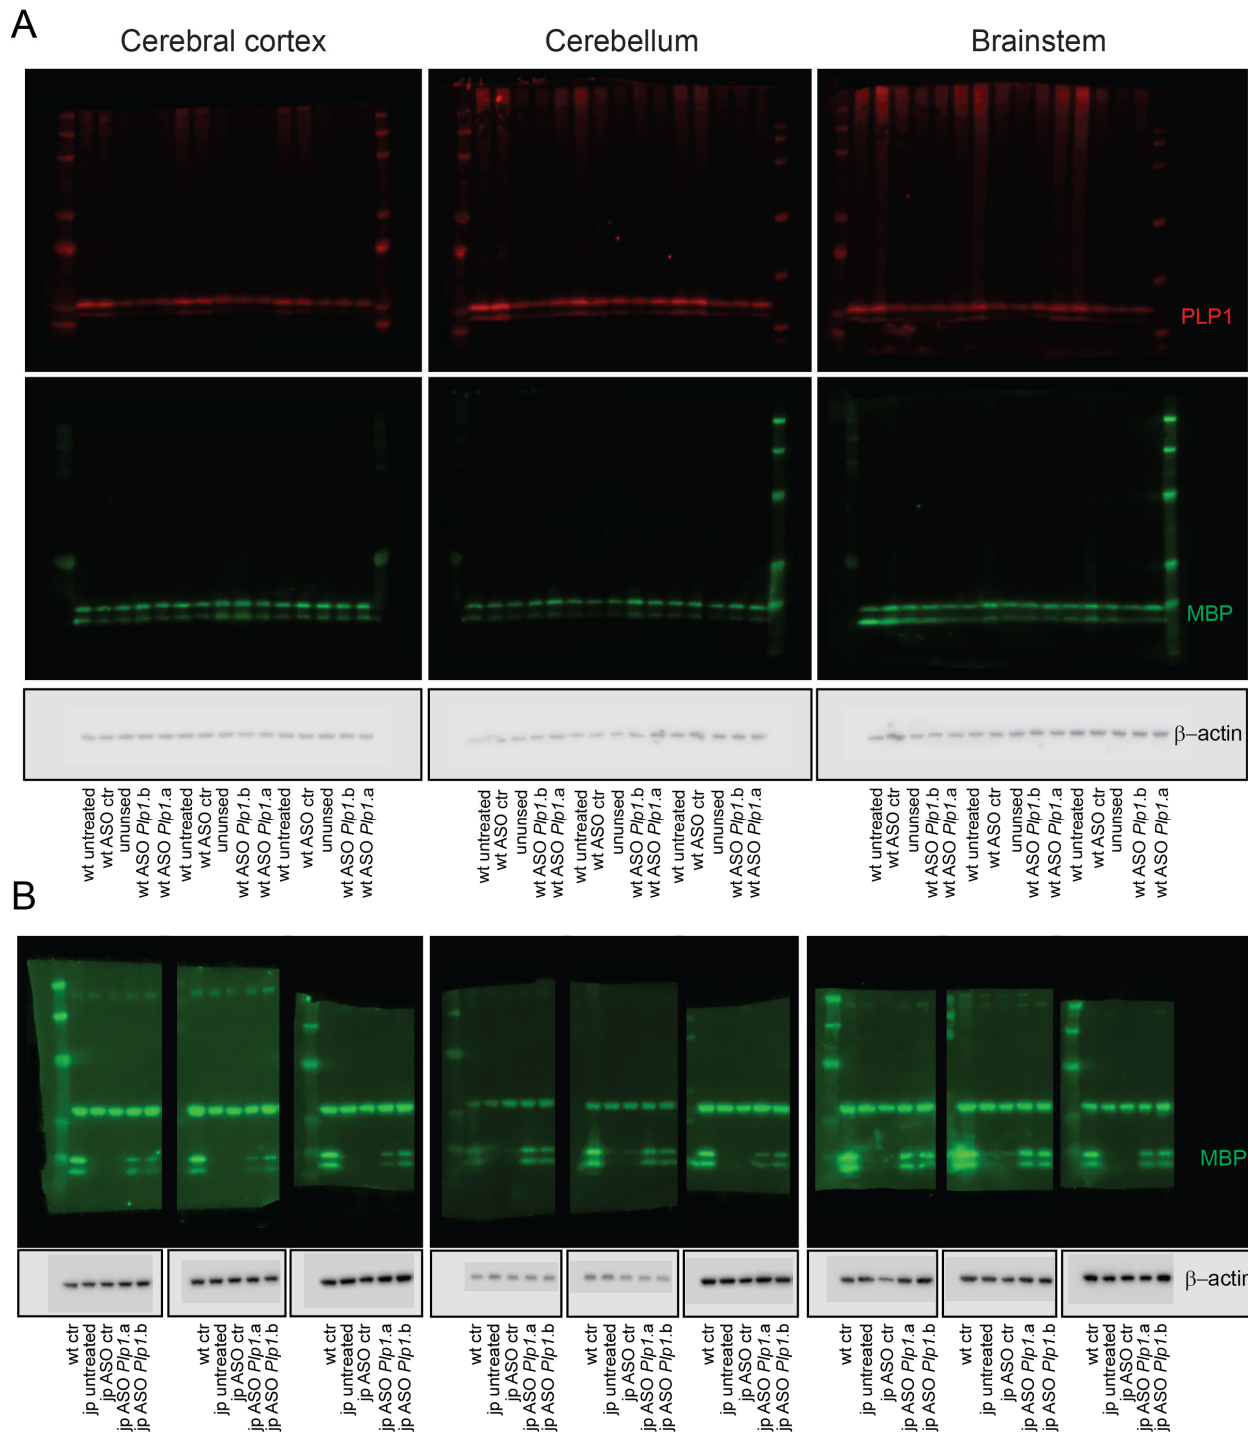

1030  
1031  
1032  
1033  
1034  
1035

**Supplementary Figure 4**

**a-b**, Labeled raw images of western blots for all samples in Extended Data Figs. 7b, c, e. The upper bands in the fluorescent blots in panel B are carry over from chemiluminescent detection of B-actin (bottom panel).

1036 **SUPPLEMENTARY VIDEOS 1-4 (four separate MP4 files)**

1037  
1038 **Supplementary Video 1 | CRISPR-mediated knockdown of *Plp1* in *jimpy* mice rescues**  
1039 **neurological phenotypes at 3 weeks of age.**

1040 Video comparison of wild-type, *jimpy*, and CR-*impy* mice at 3 weeks of age.

1041  
1042 **Supplementary Video 2 | CRISPR-mediated knockdown of *Plp1* in *jimpy* mice shows**  
1043 **sustained rescue of neurological phenotypes at 18 months of age.**

1044 Video comparison of wild-type and CR-*impy* mice at 18 weeks of age (study endpoint).

1045  
1046 **Supplementary Video 3 | Postnatal delivery of *Plp1*-targeted ASOs to *jimpy* mice rescues**  
1047 **neurological phenotypes at 3 weeks of age.**

1048 Video comparison of wild-type and *jimpy* mice treated with control and *Plp1*-targeting ASOs at 3  
1049 weeks of age.

1050  
1051 **Supplementary Video 4 | Postnatal delivery of *Plp1*-targeted ASOs to *jimpy* mice shows**  
1052 **sustained rescue of neurological phenotypes at 6 months of age.**

1053 Video comparison of wild-type and *jimpy* mice treated with control and *Plp1*-targeting ASOs at 6  
1054 months of age.

### Supplementary References

1. J. Y. Garbern *et al.*, Proteolipid protein is necessary in peripheral as well as central myelin. *Neuron* **19**, 205-218 (1997).
2. J. Y. Garbern *et al.*, Patients lacking the major CNS myelin protein, proteolipid protein 1, develop length-dependent axonal degeneration in the absence of demyelination and inflammation. *Brain* **125**, 551-561 (2002).
3. P. Lassuthova *et al.*, Three new PLP1 splicing mutations demonstrate pathogenic and phenotypic diversity of Pelizaeus-Merzbacher disease. *Journal of child neurology* **29**, 924-931 (2014).
4. E. A. Siermans *et al.*, A (G-to-A) mutation in the initiation codon of the proteolipid protein gene causing a relatively mild form of Pelizaeus-Merzbacher disease in a Dutch family. *Hum Genet* **97**, 337-339 (1996).
5. C. K. Hand, G. Bernard, M.-P. Dubé, M. I. Shevell, G. A. Rouleau, A Novel PLP1 Mutation Further Expands the Clinical Heterogeneity at the Locus. *The Canadian Journal of Neurological Sciences* **39**, 220-224 (2014).
